# Supplementary material for: Selection and Evaluation of Reference Genes for ddPCR-Based Transcript Abundance Studies in Oidiodendron Maius Across Varying Carbon Sources
Source: Research Square preprint supplement (doi:10.21203/rs.3.rs-131970/v1), 2021-01-04
Supplement: Supplementary file 1 [file 293c53651cbda3a49fd7d594.xlsx]

## Sheet: Sheet1
BMC Genomics Supporting Information
Article Title: Selection and Evaluation of Reference Genes for ddPCR-Based Transcript Abundance Studies in Oidiodendron maius across varying carbon sources
Authors: Erin Feldman, Annegret Kohler, Elena Martino, Melanie Jones, Dan Durall

## Sheet: Candidate Reference Shortlist
Table S1. Shortlist of 251 candidate reference genes in O. maius based on constant relative expression acorss five treatments
Transcript ID	Protein ID	Fold Change MYC vs FLM	Baggerley's test: MYC vs FLM original values - FDR p-value correction	FLM Means (Kohler et al. 2015)	MYC Means (Kohler et al. 2015)	Fold Change Peat vs NH4	Baggerley's test: Peat vs NH4 original values - FDR p-value correction	Fold Change Peat vs BSA	Baggerley's test: BSA vs Peat original values - FDR p-value correction	Fold Change NH4 vs BSA	Baggerley's test: BSA vs NH4 original values - FDR p-value correction	NH4 - Means	Peat - Means	BSA - Means	Protein Length	GO_Name	Interpro Desc	kogid	kogdefline	kogClass	kogGroup
jgi|Oidma1|100148|	100073	1.11516	0.835259	25.6416	28.5943	0.972865	1	1.09342	0.927617	1.12392	0.806379	24.4405	23.7773	21.7457	786	protein binding ; zinc ion binding ; nucleotide binding ; nucleoside-triphosphatase activity	Zinc finger, PHD-type ; HMG-I and HMG-Y, DNA-binding ; Zinc finger, PHD-type ; AAA+ ATPase, core ; Zinc finger, PHD-type ; Zinc finger, PHD-type ; Zinc finger, FYVE/PHD-type	KOG2228	Origin recognition complex, subunit 4	Replication, recombination and repair	INFORMATION STORAGE AND PROCESSING
jgi|Oidma1|100575|	100500	1.03885	1	45.9411	47.7258	0.975895	1	1.07481	0.918357	1.10136	0.804462	33.4513	32.645	30.3727	596	purine ribonucleoside monophosphate biosynthetic process ; deaminase activity ; adenosine deaminase activity ; deoxyadenosine deaminase activity	Adenosine/AMP deaminase	KOG1097	Adenine deaminase/adenosine deaminase	Nucleotide transport and metabolism	METABOLISM
jgi|Oidma1|101034|	100959	1.08685	0.92801	22.7509	24.7268	0.964476	1	1.04801	0.996186	1.08661	0.901568	18.8062	18.1381	17.3073	505	3',5'-cyclic-AMP phosphodiesterase activity ; cAMP catabolic process ; 3',5'-cyclic-nucleotide phosphodiesterase activity ; regulation of cyclic-nucleotide phosphodiesterase activity	Cyclic-AMP phosphodiesterase/lactamase ; Cyclic-AMP phosphodiesterase, class-II ; Cyclic-AMP phosphodiesterase, class-II
jgi|Oidma1|101240|	101165	0.90313	0.663984	43.6869	39.4549	0.916506	0.971105	1.0179	0.988161	1.11063	0.73004	44.2965	40.598	39.8843	432	nucleic acid binding	RNA recognition motif, RNP-1 ; RNA recognition motif, RNP-1 ; RNA recognition motif, RNP-1	KOG4210	Nuclear localization sequence binding protein	Transcription	INFORMATION STORAGE AND PROCESSING
jgi|Oidma1|101506|	101431	0.928119	0.581624	79.4687	73.7565	0.964926	1	0.866387	0.955449	0.89788	0.863698	46.2685	44.6456	51.5308	636	catalytic activity ; carboxylic acid metabolic process ; transferase activity, transferring acyl groups, acyl groups converted into alkyl on transfer ; 2-isopropylmalate synthase activity ; leucine biosynthetic process	Pyruvate carboxyltransferase ; 2-isopropylmalate synthase LeuA, allosteric (dimerisation) domain ; Yeast 2-isopropylmalate synthase ; Pyruvate carboxyltransferase ; Alpha-isopropylmalate/homocitrate synthase, conserved site ; Alpha-isopropylmalate/homocitrate synthase, conserved site ; 2-isopropylmalate synthase LeuA, allosteric (dimerisation) domain	KOG2367	Alpha-isopropylmalate synthase/homocitrate synthase	Amino acid transport and metabolism	METABOLISM
jgi|Oidma1|101861|	101786	0.95809	0.92092	93.1135	89.2112	1.14532	0.698475	1.14758	0.708353	1.00197	0.985553	38.6736	44.2936	38.5975	573	oxidoreductase activity ; FAD binding ; NADH dehydrogenase activity	Pyridine nucleotide-disulphide oxidoreductase, NAD-binding region ; FAD-dependent pyridine nucleotide-disulphide oxidoreductase	KOG2495	NADH-dehydrogenase (ubiquinone)	Energy production and conversion	METABOLISM
jgi|Oidma1|101886|	101811	0.818832	0.631557	47.4563	38.8588	1.03282	0.926495	0.964053	1	0.93342	0.923518	60.9546	62.955	65.3024	292	ubiquinone biosynthetic process ; 2-polyprenyl-6-methoxy-1,4-benzoquinone methyltransferase activity ; hexaprenyldihydroxybenzoate methyltransferase activity	Methyltransferase type 12 ; Ubiquinone biosynthesis O-methyltransferase	KOG1270	Methyltransferases	Coenzyme transport and metabolism	METABOLISM
jgi|Oidma1|101933|	101858	0.812062	0.0870508	110.34	89.6029	0.936856	0.990834	1.04	0.916726	1.1101	0.641324	62.9729	58.9965	56.7272	428	protein folding ; heat shock protein binding ; unfolded protein binding	Heat shock protein DnaJ ; Heat shock protein DnaJ, N-terminal ; Heat shock protein DnaJ, cysteine-rich region ; Chaperone DnaJ, C-terminal ; Heat shock protein DnaJ, N-terminal ; Heat shock protein DnaJ, N-terminal ; Heat shock protein DnaJ, cysteine-rich region ; Heat shock protein DnaJ, N-terminal ; Heat shock protein DnaJ, N-terminal ; HSP40/DnaJ peptide-binding ; Heat shock protein DnaJ, cyst…	KOG0712	Molecular chaperone (DnaJ superfamily)	Posttranslational modification, protein turnover, chaperones	CELLULAR PROCESSES AND SIGNALING
jgi|Oidma1|102334|	102259	1.11627	0.853518	71.9154	80.2768	1.14751	0.688769	1.07133	0.898822	0.93362	0.965178	35.1452	40.3294	37.644	530	protein binding ; ATP binding ; cellular protein metabolic process ; protein folding ; unfolded protein binding	Chaperonin Cpn60 ; Chaperonin Cpn60/TCP-1 ; Chaperonin Cpn60/TCP-1 ; T-complex protein 1, beta subunit ; Chaperonin TCP-1, conserved site ; Chaperonin TCP-1, conserved site ; Chaperonin TCP-1, conserved site ; GroEL-like chaperone, ATPase	KOG0363	Chaperonin complex component, TCP-1 beta subunit (CCT2)	Posttranslational modification, protein turnover, chaperones	CELLULAR PROCESSES AND SIGNALING
jgi|Oidma1|102649|	102574	0.992063	0.988933	23.9093	23.7195	1.11915	0.879076	1.05492	0.987721	0.942605	0.985186	18.2832	20.4616	19.3964	1066	GTP binding ; GTPase activity ; translation ; protein-synthesizing GTPase activity	Protein synthesis factor, GTP-binding ; Protein synthesis factor, GTP-binding ; Translation elongation factor EFG/EF2, C-terminal ; Translation elongation factor EFTu/EF1A, domain 2 ; Translation elongation factor EFG/EF2, domain IV ; Translation elongation and initiation factors/Ribosomal, beta-barrel ; Elongation factor G, III and V	KOG0467	Translation elongation factor 2/ribosome biogenesis protein RIA1 and related proteins	Translation, ribosomal structure and biogenesis	INFORMATION STORAGE AND PROCESSING
jgi|Oidma1|102957|	102882	1.18357	0.843431	16.0916	19.0456	0.932255	1	1.07439	0.976045	1.15246	0.796245	19.3039	17.9962	16.7502	337	nucleus	SET ; SET ; SET	KOG2084	Predicted histone tail methylase containing SET domain	Chromatin structure and dynamics	INFORMATION STORAGE AND PROCESSING
jgi|Oidma1|103072|	102997	0.981848	0.861911	46.1872	45.3488	1.03301	0.972135	0.960167	1	0.92948	0.953166	32.1462	33.2075	34.5852	785	protein binding ; zinc ion binding	Zinc finger, RING-type ; Zinc finger, RING-type ; Zinc finger, RING-type	KOG0828	Predicted E3 ubiquitin ligase	Posttranslational modification, protein turnover, chaperones	CELLULAR PROCESSES AND SIGNALING
jgi|Oidma1|103269|	103194	1.162	0.695135	51.2884	59.5973	1.03037	0.973849	0.997866	1	0.968457	1	32.5184	33.5059	33.5775	596	transcription factor activity ; nucleus ; regulation of transcription, DNA-dependent ; zinc ion binding ; sequence-specific DNA binding ; nuclear chromosome ; chromatin remodeling	Zinc finger, GATA-type ; SNF5/SMARCB1/INI1	KOG1649	SWI-SNF chromatin remodeling complex, Snf5 subunit	Chromatin structure and dynamics	INFORMATION STORAGE AND PROCESSING
jgi|Oidma1|103282|	103207	1.12202	0.796654	64.8134	72.7219	0.965824	1	0.889177	0.988161	0.92064	0.907096	58.7837	56.7747	63.8509	449	aminomethyltransferase activity ; cytoplasm ; glycine catabolic process ; glycine cleavage system	Glycine cleavage T-protein, N-terminal ; Glycine cleavage T-protein, C-terminal barrel ; Glycine cleavage system T protein ; Glycine cleavage system T protein	KOG2770	Aminomethyl transferase	Amino acid transport and metabolism	METABOLISM
jgi|Oidma1|103739|	103664	1.02257	1	42.597	43.5584	1.04074	0.929735	0.954493	1	0.917129	0.917226	45.1612	47.0011	49.2419	772	proteolysis ; metallopeptidase activity ; zinc ion binding ; hydrolase activity, acting on carbon-nitrogen (but not peptide) bonds, in linear amidines ; metal ion binding ; stromelysin 3 activity ; collagenase activity ; prenyl protein specific endopeptidase activity ; matrilysin-2 activity	Peptidase M, neutral zinc metallopeptidases, zinc-binding site ; Ureohydrolase ; Mannose-binding lectin	KOG4525	Jacalin-like lectin domain-containing protein	General function prediction only	POORLY CHARACTERIZED
jgi|Oidma1|103949|	103874	1.19001	0.255182	81.7474	97.2806	1.06224	0.851153	1.13404	0.620819	1.06759	0.805598	57.7929	61.3901	54.1339	710	GTPase activity ; GTP binding ; translation release factor activity ; translational termination ; translation ; protein-synthesizing GTPase activity	Protein synthesis factor, GTP-binding ; Yeast eukaryotic release factor ; Protein synthesis factor, GTP-binding ; Translation elongation factor EFTu/EF1A, C-terminal ; Translation elongation factor EFTu/EF1A, domain 2 ; Translation elongation and initiation factors/Ribosomal, beta-barrel ; Translation elongation factor EF1A/initiation factor IF2gamma, C-terminal	KOG0459	Polypeptide release factor 3	Translation, ribosomal structure and biogenesis	INFORMATION STORAGE AND PROCESSING
jgi|Oidma1|104141|	104066	0.905744	0.617825	46.2137	41.8578	0.873252	0.89079	0.963729	1	1.10361	0.789837	35.7638	31.2308	32.4062	646	protein modification process ; ubiquitin cycle ; small protein activating enzyme activity ; catalytic activity ; structural constituent of ribosome ; intracellular ; ribosome ; translation ; ubiquitin-protein ligase activity ; regulation of ubiquitin-protein ligase activity ; regulation of ubiquitin-protein ligase activity during meiotic cell cycle ; positive regulation of ubiquitin-protein ligas…	UBA/THIF-type NAD/FAD binding fold ; Ubiquitin-activating enzyme repeat ; Ribosomal protein S14 ; Ubiquitin-activating enzyme, E1 ; Molybdenum cofactor biosynthesis	KOG2013	SMT3/SUMO-activating complex, catalytic component UBA2	Posttranslational modification, protein turnover, chaperones	CELLULAR PROCESSES AND SIGNALING
jgi|Oidma1|104180|	104105	0.967771	0.812738	60.7814	58.8225	0.903936	0.941563	1.00311	1	1.10972	0.737234	46.1246	41.6937	41.5643	355	ornithine carbamoyltransferase activity ; amino acid metabolic process ; ornithine carbamoyltransferase complex ; amino acid binding ; carboxyl- or carbamoyltransferase activity	Aspartate/ornithine carbamoyltransferase ; Ornithine carbamoyltransferase ; Aspartate/ornithine carbamoyltransferase, Asp/Orn-binding region ; Aspartate/ornithine carbamoyltransferase, carbamoyl-P binding ; Ornithine carbamoyltransferase ; Aspartate/ornithine carbamoyltransferase ; Aspartate/ornithine carbamoyltransferase	KOG1504	Ornithine carbamoyltransferase OTC/ARG3	Amino acid transport and metabolism	METABOLISM
jgi|Oidma1|104201|	104126	1.00104	0.995886	28.901	28.931	1.00913	0.998974	0.956176	1	0.947528	0.982043	24.8036	25.03	26.1772	434	peroxisomal membrane ; peroxisome organization and biogenesis	Pex, N-terminal	KOG0826	Predicted E3 ubiquitin ligase involved in peroxisome organization	Posttranslational modification, protein turnover, chaperones	CELLULAR PROCESSES AND SIGNALING
jgi|Oidma1|105370|	105295	1.02358	1	58.3628	59.739	0.909535	0.939033	0.853698	0.901727	0.938609	0.950647	63.7764	58.0068	67.9477	357	protein retention in ER ; integral to membrane ; ER retention sequence binding	ER lumen protein retaining receptor ; ER lumen protein retaining receptor ; ER lumen protein retaining receptor	KOG3106	ER lumen protein retaining receptor	Intracellular trafficking, secretion, and vesicular transport	CELLULAR PROCESSES AND SIGNALING
jgi|Oidma1|105637|	105562	1.01547	1	27.5393	27.9654	0.932155	0.998974	1.07013	0.948017	1.14802	0.739088	27.5888	25.717	24.0316	534	nucleotide binding ; aspartate-tRNA ligase activity ; ATP binding ; cytoplasm ; translation ; aspartyl-tRNA aminoacylation ; aminoacyl-tRNA ligase activity ; tRNA aminoacylation for protein translation ; nucleic acid binding ; asparagine-tRNA ligase activity ; asparaginyl-tRNA aminoacylation	Aspartyl-tRNA synthetase, class IIb ; Aminoacyl-tRNA synthetase, class II (D, K and N) ; Nucleic acid binding, OB-fold, tRNA/helicase-type ; Asparaginyl-tRNA synthetase, class IIb ; Aminoacyl-tRNA synthetase, class II ; Nucleic acid-binding, OB-fold-like	KOG0554	Asparaginyl-tRNA synthetase (mitochondrial)	Translation, ribosomal structure and biogenesis	INFORMATION STORAGE AND PROCESSING
jgi|Oidma1|106149|	106074	1.05097	1	27.7907	29.2072	0.887216	0.939092	1.03387	0.994436	1.1653	0.683792	30.2333	26.8235	25.9447	348	hydrolase activity, acting on carbon-nitrogen (but not peptide) bonds, in cyclic amides ; catalytic activity ; metabolic process ; dihydroorotase activity	Amidohydrolase 2 ; TonB box, conserved site ; Dihydroorotase, conserved site	KOG2902	Dihydroorotase	Nucleotide transport and metabolism	METABOLISM
jgi|Oidma1|106633|	106558	1.10056	0.5976	163.713	180.175	1.00464	0.942295	0.912626	1	0.908408	0.86363	158.642	159.379	174.638	423	nucleus ; nucleosome assembly	Nucleosome assembly protein (NAP)	KOG1507	Nucleosome assembly protein NAP-1	Chromatin structure and dynamics	INFORMATION STORAGE AND PROCESSING
jgi|Oidma1|106729|	106654	0.803552	0.0294019	92.7125	74.4993	1.10137	0.69641	1.10668	0.717152	1.00482	0.979664	60.4992	66.6321	60.2092	335	protein kinase activity ; ATP binding ; protein amino acid phosphorylation ; protein-tyrosine kinase activity ; protein serine/threonine kinase activity ; cyclin-dependent protein kinase activity	Protein kinase, core ; Serine/threonine protein kinase-related ; Tyrosine protein kinase ; Serine/threonine protein kinase ; Protein kinase, core ; Protein kinase ATP binding, conserved site ; Serine/threonine protein kinase, active site ; Protein kinase-like	KOG0594	Protein kinase PCTAIRE and related kinases	General function prediction only	POORLY CHARACTERIZED
jgi|Oidma1|107427|	107352	0.905505	0.870623	68.523	62.048	1.13996	0.585256	1.05477	0.87836	0.925264	0.924066	54.6174	62.2619	59.029	240	structural constituent of ribosome ; mitochondrial ribosome ; translation	Ribosomal protein L47, mitochondrial	KOG3331	Mitochondrial/chloroplast ribosomal protein L4/L29	Translation, ribosomal structure and biogenesis	INFORMATION STORAGE AND PROCESSING
jgi|Oidma1|107884|	107809	1.18635	0.781844	35.3906	41.9855	0.989984	1	0.964144	1	0.973899	1	36.9471	36.577	37.9373	630	nucleus	SET ; SET ; SET	KOG2589	Histone tail methylase	Chromatin structure and dynamics	INFORMATION STORAGE AND PROCESSING
jgi|Oidma1|108318|	108243	0.96418	0.752108	84.6568	81.6245	0.933747	0.982245	1.0778	0.805628	1.15427	0.473397	83.8045	78.2522	72.6037	482	membrane	TMS membrane protein/tumour differentially expressed protein	KOG2592	Tumor differentially expressed (TDE) protein	Function unknown	POORLY CHARACTERIZED
jgi|Oidma1|109255|	109180	1.19459	0.634276	24.1969	28.9053	1.03327	0.9915	1.07013	0.986786	1.03568	0.974419	16.8606	17.4215	16.2798	1266	nucleic acid binding ; helicase activity ; ATP binding ; ATP-dependent helicase activity ; hydrolase activity, acting on acid anhydrides, in phosphorus-containing anhydrides ; ATP-dependent DNA helicase activity ; ATP-dependent RNA helicase activity ; DNA-dependent ATPase activity ; RNA-dependent ATPase activity ; protein-transmembrane transporting ATPase activity ; ATPase activity ; single-stran…	DNA/RNA helicase, DEAD/DEAH box type, N-terminal ; DNA/RNA helicase, C-terminal ; DSH, C-terminal ; RNA helicase, ATP-dependent, SK12/DOB1 ; DEAD-like helicase, N-terminal ; DNA/RNA helicase, C-terminal ; Helicase, superfamily 1 and 2, ATP-binding ; DNA/RNA helicase, C-terminal	KOG0947	Cytoplasmic exosomal RNA helicase SKI2, DEAD-box superfamily	RNA processing and modification	INFORMATION STORAGE AND PROCESSING
jgi|Oidma1|111020|	110945	0.871212	0.571434	42.0279	36.6152	0.960569	1	0.859631	0.987127	0.894919	0.908624	19.7513	18.9724	22.0704	410	metabolic process ; transferase activity ; biosynthetic process ; transferase activity, transferring nitrogenous groups ; pyridoxal phosphate binding ; histidine biosynthetic process ; histidinol-phosphate transaminase activity	Aminotransferase, class I and II ; Histidinol-phosphate aminotransferase ; Aminotransferase, class-II, pyridoxal-phosphate binding site ; Pyridoxal phosphate-dependent transferase, major region	KOG0633	Histidinol phosphate aminotransferase	Amino acid transport and metabolism	METABOLISM
jgi|Oidma1|111804|	111729	1.11522	0.789973	72.5548	80.9145	1.05362	0.918333	1.04014	0.947739	0.987206	1	40.5988	42.7759	41.125	552	protein binding ; ATP binding ; cellular protein metabolic process ; protein folding ; unfolded protein binding ; chaperonin ATPase activity ; chaperonin ATPase complex	Chaperonin Cpn60 ; Chaperonin Cpn60/TCP-1 ; Chaperonin Cpn60/TCP-1 ; T-complex protein 1, theta subunit ; GroEL-like chaperone, ATPase	KOG0362	Chaperonin complex component, TCP-1 theta subunit (CCT8)	Posttranslational modification, protein turnover, chaperones	CELLULAR PROCESSES AND SIGNALING
jgi|Oidma1|112220|	112145	1.12535	0.598455	151.25	170.209	1.02544	0.894822	0.92416	1	0.901235	0.6883	114.61	117.526	127.171	536	aldehyde dehydrogenase [NAD(P)+] activity ; aldehyde metabolic process ; metabolic process ; oxidoreductase activity	Aldehyde dehydrogenase ; Aldehyde dehydrogenase NAD(P)-dependent ; Aldehyde/histidinol dehydrogenase	KOG2456	Aldehyde dehydrogenase	Energy production and conversion	METABOLISM
jgi|Oidma1|112294|	112219	0.813604	0.000563588	209.264	170.258	0.937449	0.995879	0.893493	0.845774	0.953111	0.983493	331.47	310.736	347.777	328	membrane ; protein binding ; vesicle-mediated transport	Syntaxin, N-terminal ; Target SNARE coiled-coil region ; Target SNARE coiled-coil region ; Syntaxin, N-terminal ; Target SNARE coiled-coil region ; t-SNARE	KOG0810	SNARE protein Syntaxin 1 and related proteins	Intracellular trafficking, secretion, and vesicular transport	CELLULAR PROCESSES AND SIGNALING
jgi|Oidma1|112917|	112842	1.13008	0.431054	149.573	169.03	1.04662	0.85301	1.10271	0.530663	1.05359	0.691592	224.072	234.518	212.674	181	iron ion binding ; iron-sulfur cluster assembly ; iron-sulfur cluster binding ; protein binding	NIF system FeS cluster assembly, NifU, N-terminal ; ISC system FeS cluster assembly, IscU scaffold	KOG3361	Iron binding protein involved in Fe-S cluster formation	Energy production and conversion	METABOLISM
jgi|Oidma1|113359|	113284	0.851126	0.199738	162.294	138.133	1.14125	0.463281	1.07406	0.744585	0.941126	0.946403	77.4024	88.3352	82.2444	709	viral nucleocapsid ; protein binding ; zinc ion binding	Arenavirus nucleocapsid protein ; Zinc finger, RING-type ; E3 ubiquitin ligase, BRE1 ; Zinc finger, RING-type ; Zinc finger, RING-type ; Zinc finger, RING-type ; Prefoldin	KOG0978	E3 ubiquitin ligase involved in syntaxin degradation	Posttranslational modification, protein turnover, chaperones	CELLULAR PROCESSES AND SIGNALING
jgi|Oidma1|113952|	113877	1.07403	0.98721	63.9643	68.6996	1.01009	0.995879	0.965202	1	0.955561	0.99666	50.9436	51.4576	53.3128	489	nucleic acid binding ; helicase activity ; ATP binding ; ATP-dependent helicase activity ; diacylglycerol pyrophosphate phosphatase activity ; thiamin-pyrophosphatase activity ; 8-oxo-7,8-dihydroguanine triphosphatase activity ; UDP-2,3-diacylglucosamine hydrolase activity ; bis(5'-nucleosyl)-tetraphosphatase activity ; dATP pyrophosphohydrolase activity ; pyrophosphatase activity ; dihydroneopte…	DNA/RNA helicase, DEAD/DEAH box type, N-terminal ; DNA/RNA helicase, C-terminal ; DEAD-like helicase, N-terminal ; DNA/RNA helicase, C-terminal ; Helicase, superfamily 1 and 2, ATP-binding ; DNA/RNA helicase, C-terminal ; RNA helicase, DEAD-box type, Q motif	KOG0332	ATP-dependent RNA helicase	RNA processing and modification	INFORMATION STORAGE AND PROCESSING
jgi|Oidma1|115526|	115451	1.00028	0.968778	93.1217	93.1474	0.95943	1	1.04239	0.973989	1.08647	0.851822	86.9749	83.4463	80.0528	236	intracellular ; ribosome biogenesis and assembly	Ribosomal protein L10	KOG0816	Protein involved in mRNA turnover	RNA processing and modification	INFORMATION STORAGE AND PROCESSING
jgi|Oidma1|117252|	117177	0.948214	0.825294	62.2702	59.0455	1.05944	0.84493	1.01972	0.945839	0.962511	1	64.6142	68.4547	67.1309	384	integral to membrane	EXS, C-terminal	KOG1162	Predicted small molecule transporter	Intracellular trafficking, secretion, and vesicular transport	CELLULAR PROCESSES AND SIGNALING
jgi|Oidma1|117268|	117193	0.994347	0.944451	107.632	107.024	0.939241	0.997064	0.96728	1	1.02985	0.930614	118.004	110.834	114.583	390	nucleotide binding ; nucleoside-triphosphatase activity ; ATP binding ; nucleus ; cytoplasm ; hydrolase activity ; protein catabolic process	AAA ATPase, core ; AAA+ ATPase, core ; 26S proteasome subunit P45 ; AAA ATPase, conserved site ; Prefoldin	KOG0651	26S proteasome regulatory complex, ATPase RPT4	Posttranslational modification, protein turnover, chaperones	CELLULAR PROCESSES AND SIGNALING
jgi|Oidma1|117526|	117451	0.942809	0.850231	34.2262	32.2688	1.00146	0.998996	0.91606	1	0.914726	0.924467	31.1219	31.1674	34.0232	452	catalytic activity ; CAAX-protein geranylgeranyltransferase activity	Prenyltransferase/squalene oxidase ; Terpenoid cylases/protein prenyltransferase alpha-alpha toroid	KOG0367	Protein geranylgeranyltransferase Type I, beta subunit	Posttranslational modification, protein turnover, chaperones	CELLULAR PROCESSES AND SIGNALING
jgi|Oidma1|117700|	117625	1.12667	0.89205	128.186	144.423	0.95234	0.994502	1.01221	0.996186	1.06286	0.868674	242.056	230.519	227.739	204	calcium ion binding	Calcium-binding EF-hand
jgi|Oidma1|118077|	118002	1.18052	0.740387	196.825	232.356	0.966382	1	1.00544	0.927071	1.04042	0.783643	132.913	128.445	127.75	378	metabolic process ; oxidoreductase activity, acting on the CH-OH group of donors, NAD or NADP as acceptor ; isocitrate dehydrogenase (NAD+) activity ; mitochondrion ; tricarboxylic acid cycle ; isocitrate dehydrogenase activity	Isocitrate/isopropylmalate dehydrogenase ; Isocitrate dehydrogenase NAD-dependent, mitochondrial ; Isocitrate/isopropylmalate dehydrogenase	KOG0784	Isocitrate dehydrogenase, gamma subunit	Amino acid transport and metabolism	METABOLISM
jgi|Oidma1|118276|	118201	0.932042	0.887875	50.7846	47.3333	0.983572	1	0.855371	0.915471	0.869658	0.721853	52.8975	52.0285	60.8257	270	phosphomannomutase activity ; cytoplasm ; mannose biosynthetic process ; catalytic activity ; metabolic process	Eukaryotic phosphomannomutase ; HAD-superfamily hydrolase, subfamily IIB	KOG3189	Phosphomannomutase	Lipid transport and metabolism	METABOLISM
jgi|Oidma1|118922|	118847	1.09418	0.789973	89.3913	97.8101	0.883798	0.817432	1.00895	1	1.14161	0.612966	76.1409	67.2932	66.6963	330	catalytic activity ; metabolic process	Phosphoglycerate mutase ; Phosphoglycerate/bisphosphoglycerate mutase	KOG0235	Phosphoglycerate mutase	Carbohydrate transport and metabolism	METABOLISM
jgi|Oidma1|120006|	119931	0.804833	0.600017	27.5248	22.1529	0.87437	0.944076	0.88777	1	1.01532	0.977222	28.1549	24.6178	27.7299	513	oxidoreductase activity ; cyclopropane-fatty-acyl-phospholipid synthase activity	FAD dependent oxidoreductase	KOG0399	Glutamate synthase	Amino acid transport and metabolism	METABOLISM
jgi|Oidma1|122040|	121965	1.12161	0.774428	53.2916	59.7723	0.875621	0.828046	0.885097	0.983791	1.01082	0.959683	60.9368	53.3575	60.2844	329	tRNA processing ; tRNA dihydrouridine synthase activity ; FAD binding ; F420H2 dehydrogenase activity ; sulfur oxygenase reductase activity ; malolactic enzyme activity ; regulation of oxidoreductase activity	Dihydrouridine synthase, DuS ; Dihydrouridine synthase, DuS ; Dihydrouridine synthase, DuS	KOG2335	tRNA-dihydrouridine synthase	Translation, ribosomal structure and biogenesis	INFORMATION STORAGE AND PROCESSING
jgi|Oidma1|123031|	122956	0.85175	0.570332	53.6233	45.6737	1.12657	0.817939	1.10278	0.558824	0.978878	1	89.6108	100.953	91.5444	289	oxidoreductase activity ; alcohol dehydrogenase activity ; alcohol dehydrogenase activity, metal ion-independent ; alcohol dehydrogenase activity, zinc-dependent ; alcohol dehydrogenase activity, iron-dependent	Aldo/keto reductase ; Aldo/keto reductase ; Aldo/keto reductase ; Aldo/keto reductase ; Aldo/keto reductase ; Aldo/keto reductase ; Aldo/keto reductase	KOG1577	Aldo/keto reductase family proteins	General function prediction only	POORLY CHARACTERIZED
jgi|Oidma1|125014|	124939	1.04314	0.986267	74.6581	77.8786	0.916956	0.924825	0.873322	0.915167	0.952414	0.974963	93.2232	85.4815	97.8809	495	sterol O-acyltransferase activity	Membrane bound O-acyl transferase, MBOAT	KOG0380	Sterol O-acyltransferase/Diacylglycerol O-acyltransferase	Lipid transport and metabolism	METABOLISM
jgi|Oidma1|125901|	125826	1.02062	1	75.2057	76.7566	1.03645	0.942534	0.905591	1	0.873743	0.798229	52.6454	54.5644	60.2527	397	beta-lactamase activity ; beta-lactam antibiotic catabolic process ; response to antibiotic	Beta-lactamase ; Beta-lactamase-type transpeptidase fold
jgi|Oidma1|125996|	125921	0.991783	0.869525	90.8445	90.098	1.07559	0.76591	1.02097	0.933537	0.949216	0.974171	69.9339	75.2203	73.6755	1421	transport ; integral to membrane ; ubiquitin thiolesterase activity ; ubiquitin-dependent protein catabolic process	Peptidase C19, ubiquitin carboxyl-terminal hydrolase 2 ; MATH ; emp24/gp25L/p24 ; MATH ; MATH ; Peptidase C19, ubiquitin carboxyl-terminal hydrolase 2 ; GOLD ; Peptidase C19, ubiquitin carboxyl-terminal hydrolase 2 ; Peptidase C19, ubiquitin carboxyl-terminal hydrolase 2 ; TRAF-like	KOG1863	Ubiquitin carboxyl-terminal hydrolase	Posttranslational modification, protein turnover, chaperones	CELLULAR PROCESSES AND SIGNALING
jgi|Oidma1|126972|	126897	0.822038	0.129004	107.337	88.2349	0.935334	0.993237	1.01079	0.939284	1.08067	0.792783	102.93	96.2736	95.2457	283	electron carrier activity ; protein disulfide oxidoreductase activity ; cell redox homeostasis	Thioredoxin-related ; Thioredoxin domain ; Glutaredoxin ; Glutaredoxin-related protein ; Thioredoxin-like fold	KOG0911	Glutaredoxin-related protein	Posttranslational modification, protein turnover, chaperones	CELLULAR PROCESSES AND SIGNALING
jgi|Oidma1|129214|	129139	0.925969	0.889184	26.6718	24.6972	0.928365	1	0.963764	1	1.03813	0.962242	21.3325	19.8043	20.5489	234	rRNA processing ; small subunit processome	Small-subunit processome, Utp11 ; Small-subunit processome, Utp11	KOG3237	Uncharacterized conserved protein	Function unknown	POORLY CHARACTERIZED
jgi|Oidma1|129507|	129432	1.11156	0.725879	65.8731	73.2219	1.07641	0.681945	1.00211	0.991887	0.930975	0.951142	98.8906	106.447	106.223	249	nucleus	Suppressor Mra1	KOG3073	Protein required for 18S rRNA maturation and 40S ribosome biogenesis	Translation, ribosomal structure and biogenesis	INFORMATION STORAGE AND PROCESSING
jgi|Oidma1|129913|	129838	1.02979	1	24.3446	25.0699	0.878545	0.978431	0.962749	1	1.09584	0.88415	24.261	21.3144	22.1391	396	DNA binding ; 5'-3' exonuclease activity ; nuclease activity ; DNA repair ; catalytic activity ; nucleus ; GPI-anchor transamidase activity ; cyanophycinase activity ; regulation of hydrolase activity	DNA repair protein (XPGC)/yeast Rad ; XPG N-terminal ; XPG I ; 5'-3' exonuclease ; Helix-hairpin-helix motif, class 2 ; XPG I ; XPG N-terminal ; XPG N-terminal ; XPG I ; Helix-hairpin-helix motif, class 2	KOG2519	5'-3' exonuclease	Replication, recombination and repair	INFORMATION STORAGE AND PROCESSING
jgi|Oidma1|132655|	132580	1.17644	0.725392	21.6119	25.4252	1.10629	0.89079	1.09805	0.939594	0.992551	1	19.893	22.0074	20.0423	721	microtubule motor activity ; kinesin complex	Kinesin light chain ; Tetratricopeptide TPR-1 ; Tetratricopeptide region ; Tetratricopeptide region ; Tetratricopeptide region	KOG1840	Kinesin light chain	Cytoskeleton	CELLULAR PROCESSES AND SIGNALING
jgi|Oidma1|135304|	135229	1.16582	0.81761	31.0795	36.2332	1.00367	0.998974	1.03047	0.980154	1.0267	0.948996	35.3459	35.4756	34.4266	510	transcription factor activity ; nucleus ; regulation of transcription, DNA-dependent ; zinc ion binding	Fungal transcriptional regulatory protein, N-terminal ; Fungal transcriptional regulatory protein, N-terminal
jgi|Oidma1|137551|	137476	0.887434	0.775526	32.7137	29.0312	0.92076	0.9915	1.07779	0.941418	1.17054	0.690631	27.1777	25.0241	23.2181	634	DNA binding ; nucleus ; transcription ; zinc ion binding	Fungal specific transcription factor
jgi|Oidma1|140286|	140211	0.8832	0.460157	98.7218	87.1912	0.872615	0.700791	0.957407	1	1.09717	0.836287	117.818	102.81	107.383	201	GTP binding ; small GTPase mediated signal transduction ; intracellular ; protein transport	Ras GTPase ; Ras ; Ras small GTPase, Ras type ; Ras small GTPase, Rho type ; Ras small GTPase, Rab type ; Small GTP-binding protein	KOG0393	Ras-related small GTPase, Rho type	General function prediction only	POORLY CHARACTERIZED
jgi|Oidma1|140339|	140264	1.02587	1	61.9932	63.5971	1.02949	0.922684	1.13518	0.844498	1.10266	0.846169	74.4345	76.6293	67.5043	537	ATP binding ; ATPase activity	ABC transporter-like ; Galactose oxidase/kelch, beta-propeller
jgi|Oidma1|140615|	140540	0.992719	0.986528	40.0647	39.773	0.943288	0.998996	0.883818	1	0.936954	0.971691	51.6443	48.7155	55.1194	588	protein binding ; zinc ion binding ; peptidyl-prolyl cis-trans isomerase activity ; cyclophilin ; FK506-sensitive peptidyl-prolyl cis-trans isomerase ; cyclophilin-type peptidyl-prolyl cis-trans isomerase activity	Zinc finger, PHD-type ; Ubiquitin interacting motif ; Zinc finger, PHD-type ; Ubiquitin interacting motif ; Zinc finger, PHD-type ; Zinc finger, FYVE/PHD-type	KOG1844	PHD Zn-finger proteins	General function prediction only	POORLY CHARACTERIZED
jgi|Oidma1|141050|	140975	1.08665	0.89205	20.2192	21.9711	0.981375	1	0.944318	1	0.96224	1	20.851	20.4626	21.6692	948	heat shock protein binding	Heat shock protein DnaJ, N-terminal ; Heat shock protein DnaJ, N-terminal ; Heat shock protein DnaJ, N-terminal ; Heat shock protein DnaJ, N-terminal ; Heat shock protein DnaJ, N-terminal	KOG0714	Molecular chaperone (DnaJ superfamily)	Posttranslational modification, protein turnover, chaperones	CELLULAR PROCESSES AND SIGNALING
jgi|Oidma1|141558|	141483	0.842229	0.672817	46.0134	38.7538	0.867744	0.790161	1.0039	0.988161	1.15691	0.478719	63.9028	55.4512	55.2359	358	heat shock protein binding	Heat shock protein DnaJ, N-terminal ; Heat shock protein DnaJ, N-terminal ; Heat shock protein DnaJ, N-terminal ; Heat shock protein DnaJ, N-terminal	KOG0714	Molecular chaperone (DnaJ superfamily)	Posttranslational modification, protein turnover, chaperones	CELLULAR PROCESSES AND SIGNALING
jgi|Oidma1|141872|	141797	0.821816	0.313452	60.0603	49.3585	1.05768	0.842774	1.04444	0.891914	0.987487	1	66.0889	69.9008	66.9264	309	catalytic activity ; metabolic process ; lyase activity ; 2-amino-5-formylamino-6-(5-phosphoribosylamino)pyrimidin-4(3H)-one formate-lyase activity ; regulation of lyase activity	Vitamin B6 biosynthesis protein ; Vitamin B6 biosynthesis protein ; Vitamin B6 biosynthesis protein ; Vitamin B6 biosynthesis protein ; Vitamin B6 biosynthesis protein ; Vitamin B6 biosynthesis protein ; Ribulose-phosphate binding barrel	KOG1606	Stationary phase-induced protein, SOR/SNZ family	Coenzyme transport and metabolism	METABOLISM
jgi|Oidma1|142041|	141966	0.858492	0.660866	75.8847	65.1464	0.870118	0.736765	0.928789	1	1.06743	0.763638	84.9133	73.8846	79.5494	404	heme binding ; transition metal ion binding ; sugar binding ; carbohydrate metabolic process	Sugar isomerase (SIS) ; Cytochrome b5
jgi|Oidma1|142196|	142121	1.18703	0.552988	78.9533	93.72	0.986363	1	0.874815	0.92009	0.88691	0.707807	83.2871	82.1514	93.9071	381	porphobilinogen synthase activity ; tetrapyrrole biosynthetic process ; metal ion binding	Tetrapyrrole biosynthesis, porphobilinogen synthase ; Tetrapyrrole biosynthesis, porphobilinogen synthase ; Tetrapyrrole biosynthesis, porphobilinogen synthase ; Tetrapyrrole biosynthesis, porphobilinogen synthase ; Tetrapyrrole biosynthesis, porphobilinogen synthase	KOG2794	Delta-aminolevulinic acid dehydratase	Coenzyme transport and metabolism	METABOLISM
jgi|Oidma1|142219|	142144	0.91511	0.588564	124.96	114.352	0.911225	0.957039	0.914526	1	1.00362	0.983493	77.7839	70.8787	77.5032	363	threonine endopeptidase activity ; proteasome endopeptidase activity	Mov34-1 ; Mov34/MPN/PAD-1 ; Mov34/MPN/PAD-1	KOG2975	Translation initiation factor 3, subunit f (eIF-3f)	Translation, ribosomal structure and biogenesis	INFORMATION STORAGE AND PROCESSING
jgi|Oidma1|142391|	142316	1.02019	1	49.3165	50.3122	0.988494	1	0.981569	1	0.992995	0.995197	41.2106	40.7364	41.5013	582	protein modification process ; ubiquitin thiolesterase activity ; ubiquitin-dependent protein catabolic process	Ubiquitin ; Peptidase C19, ubiquitin carboxyl-terminal hydrolase 2 ; Ubiquitin ; Ubiquitin ; Peptidase C19, ubiquitin carboxyl-terminal hydrolase 2 ; Peptidase C19, ubiquitin carboxyl-terminal hydrolase 2 ; Peptidase C19, ubiquitin carboxyl-terminal hydrolase 2	KOG1872	Ubiquitin-specific protease	Posttranslational modification, protein turnover, chaperones	CELLULAR PROCESSES AND SIGNALING
jgi|Oidma1|142400|	142325	1.10978	0.857425	32.1141	35.6397	1.06056	0.882148	0.964062	1	0.909012	0.917295	62.2654	66.0362	68.4978	635	iron ion binding ; electron transport ; integral to membrane ; oxidoreductase activity ; FAD binding ; ferric-chelate reductase activity	Ferric reductase-like transmembrane component, N-terminal ; FAD-binding 8 ; Ferric reductase, NAD binding	KOG0039	Ferric reductase, NADH/NADPH oxidase and related proteins	Secondary metabolites biosynthesis, transport and catabolism	METABOLISM
jgi|Oidma1|142415|	142340	0.950802	0.905171	33.4383	31.7932	0.858431	0.915871	0.930501	1	1.08396	0.899086	21.9465	18.8396	20.2467	634	protein binding ; zinc ion binding	Zinc finger, PHD-type ; Zinc finger, PHD-type ; Zinc finger, PHD-type ; Zinc finger, PHD-type ; Zinc finger, FYVE/PHD-type	KOG1632	Uncharacterized PHD Zn-finger protein	General function prediction only	POORLY CHARACTERIZED
jgi|Oidma1|142624|	142549	1.11662	0.826432	59.1963	66.0995	0.984978	1	1.07605	0.830358	1.09246	0.79439	62.8779	61.9334	57.5561	644	nuclear chromosome	Rad21/Rec8 like protein, C-terminal ; Rad21/Rec8 like protein, N-terminal	KOG1213	Sister chromatid cohesion complex Cohesin, subunit RAD21/SCC1	Cell cycle control, cell division, chromosome partitioning	METABOLISM
jgi|Oidma1|143180|	143105	0.92206	0.771718	32.6922	30.1442	1.04979	0.968042	1.12893	0.891997	1.07538	0.907277	21.2159	22.2723	19.7287	713	nitrogen compound metabolic process ; hydrolase activity, acting on carbon-nitrogen (but not peptide) bonds ; NAD+ synthase (glutamine-hydrolyzing) activity ; ATP binding ; NAD biosynthetic process	Nitrilase/cyanide hydratase and apolipoprotein N-acyltransferase ; NAD+ synthase ; Glutamine-dependent NAD(+) synthetase, GAT region ; Nitrilase/cyanide hydratase and apolipoprotein N-acyltransferase ; Nitrilase/cyanide hydratase and apolipoprotein N-acyltransferase	KOG2303	Predicted NAD synthase, contains CN hydrolase domain	Coenzyme transport and metabolism	METABOLISM
jgi|Oidma1|143802|	143727	1.19867	0.422846	118.484	142.022	1.08204	0.490899	1.11595	0.227664	1.03135	0.798517	160.438	173.6	155.562	588	nucleic acid binding ; RNA binding ; nucleus ; mRNA processing	RNA recognition motif, RNP-1 ; RNA recognition motif, RNP-1 ; RNA recognition, region 1 ; Splicing factor, CC1-like ; RNA recognition motif, RNP-1	KOG0147	Transcriptional coactivator CAPER (RRM superfamily)	Transcription	INFORMATION STORAGE AND PROCESSING
jgi|Oidma1|143978|	143903	0.83377	0.413776	51.8969	43.2701	0.933933	0.995879	0.904212	1	0.968177	1	51.3798	47.9853	53.0686	356	peroxisome ; membrane	Peroxisome membrane anchor protein Pex14p, N-terminal	KOG1922	Rho GTPase effector BNI1 and related formins	Signal transduction mechanisms	CELLULAR PROCESSES AND SIGNALING
jgi|Oidma1|144710|	144635	1.12458	0.802591	52.2764	58.7891	0.965198	1	1.08066	0.873637	1.11962	0.69442	45.2214	43.6476	40.3899	417	metabolic process ; transferase activity, transferring glycosyl groups ; tryptophan biosynthetic process ; anthranilate phosphoribosyltransferase activity	Glycosyl transferase, family 3 ; Glycosyl transferase, family 3 ; Glycosyl transferase, family 3, N-terminal ; Anthranilate phosphoribosyl transferase ; Glycosyl transferase, family 3, N-terminal ; Glycosyl transferase, family 3	KOG1438	Anthranilate phosphoribosyltransferase	Amino acid transport and metabolism	METABOLISM
jgi|Oidma1|145256|	145181	0.96428	0.862528	35.2468	33.9877	0.885577	0.901745	1.00558	1	1.13551	0.659506	50.1006	44.368	44.1218	324	catalytic activity ; metabolic process ; methylglutaconyl-CoA hydratase activity	Crotonase, core	KOG1679	Enoyl-CoA hydratase	Lipid transport and metabolism	METABOLISM
jgi|Oidma1|145402|	145327	0.906457	0.542823	88.3858	80.1179	1.05024	0.934331	0.948648	1	0.903263	0.898701	45.1674	47.4368	50.0047	710	hydrolase activity	Metallophosphoesterase	KOG1995	Conserved Zn-finger protein	General function prediction only	POORLY CHARACTERIZED
jgi|Oidma1|145700|	145625	0.928883	0.600017	57.1806	53.114	1.14198	0.643205	1.08614	0.829938	0.951102	0.985457	44.6473	50.9862	46.9427	763	protein binding ; adenylate cyclase activity ; calcium- and calmodulin-responsive adenylate cyclase activity	Leucine-rich repeat ; Leucine-rich repeat ; Endonuclease/exonuclease/phosphatase ; Leucine-rich repeat, typical subtype ; Endonuclease/exonuclease/phosphatase	KOG0620	Glucose-repressible alcohol dehydrogenase transcriptional effector CCR4 and related proteins	Transcription	INFORMATION STORAGE AND PROCESSING
jgi|Oidma1|146471|	146396	0.926625	0.827052	21.3171	19.7529	0.873779	0.928736	0.920575	1	1.05356	0.927158	24.9238	21.7779	23.6568	632	catalytic activity ; metabolic process	Phospholipase D/Transphosphatidylase ; Phospholipase D/Transphosphatidylase
jgi|Oidma1|147619|	147544	0.921555	0.651964	55.6543	51.2885	0.96866	1	0.980205	1	1.01192	0.959683	58.1201	56.2986	57.4355	375	protein binding ; adenylate cyclase activity ; calcium- and calmodulin-responsive adenylate cyclase activity	Leucine-rich repeat ; Leucine-rich repeat ; Leucine-rich repeat, typical subtype	KOG0531	Protein phosphatase 1, regulatory subunit, and related proteins	Signal transduction mechanisms	CELLULAR PROCESSES AND SIGNALING
jgi|Oidma1|147811|	147736	0.969478	0.950764	23.9972	23.2648	1.03345	0.99164	1.01022	1	0.977525	1	15.3123	15.8245	15.6644	621	protein kinase activity ; ATP binding ; protein amino acid phosphorylation ; protein serine/threonine kinase activity	Protein kinase, core ; Serine/threonine protein kinase-related ; Serine/threonine protein kinase ; Protein kinase, core ; Protein kinase-like	KOG0667	Dual-specificity tyrosine-phosphorylation regulated kinase	General function prediction only	POORLY CHARACTERIZED
jgi|Oidma1|149181|	149106	1.00196	0.973195	57.2081	57.3202	0.860063	0.810837	0.867721	0.952643	1.0089	0.978129	47.7169	41.0395	47.2958	682	protein kinase activity ; ATP binding ; protein amino acid phosphorylation ; protein-tyrosine kinase activity ; protein serine/threonine kinase activity ; Goodpasture-antigen-binding protein kinase activity	Protein kinase, core ; Serine/threonine protein kinase-related ; Tyrosine protein kinase ; Serine/threonine protein kinase ; Protein kinase, core ; Protein kinase ATP binding, conserved site ; Serine/threonine protein kinase, active site ; Protein kinase-like	KOG0585	Ca2+/calmodulin-dependent protein kinase kinase beta and related serine/threonine protein kinases	Signal transduction mechanisms	CELLULAR PROCESSES AND SIGNALING
jgi|Oidma1|149310|	149235	1.04377	1	31.4655	32.8427	0.965155	1	1.01418	1	1.05079	0.940955	23.7135	22.8872	22.5673	565	DNA binding ; nucleus	Structure-specific recognition protein ; Structure-specific recognition protein	KOG0526	Nucleosome-binding factor SPN, POB3 subunit	Transcription	INFORMATION STORAGE AND PROCESSING
jgi|Oidma1|149748|	149673	0.852363	0.657552	33.9517	28.9392	0.92969	0.998159	0.875354	0.998309	0.941555	0.974856	25.2738	23.4968	26.8426	597	transcription factor activity ; nucleus ; regulation of transcription, DNA-dependent ; zinc ion binding	Fungal transcriptional regulatory protein, N-terminal ; Fungal transcriptional regulatory protein, N-terminal ; Fungal transcriptional regulatory protein, N-terminal ; Fungal transcriptional regulatory protein, N-terminal
jgi|Oidma1|149964|	149889	1.0304	1	82.5655	85.0757	1.04767	0.853174	0.988471	1	0.943497	0.937314	82.3028	86.2259	87.2316	322	arginase activity ; arginine catabolic process ; hydrolase activity, acting on carbon-nitrogen (but not peptide) bonds, in linear amidines ; metal ion binding	Arginase ; Ureohydrolase ; Arginase, subgroup ; Ureohydrolase ; Ureohydrolase ; Ureohydrolase	KOG2965	Arginase	Amino acid transport and metabolism	METABOLISM
jgi|Oidma1|150606|	150531	0.876178	0.684596	39.0256	34.1934	1.0596	0.944958	0.954764	1	0.90106	0.917295	23.1986	24.5812	25.7458	408	catalytic activity ; binding ; metabolic process	Saccharopine dehydrogenase ; NAD(P)-binding	KOG2733	Uncharacterized membrane protein	Function unknown	POORLY CHARACTERIZED
jgi|Oidma1|151579|	151504	0.804053	0.0501165	156.59	125.907	1.04659	0.824515	1.023	0.897301	0.977466	1	99.4834	104.118	101.777	455	catalytic activity ; glutamine metabolic process ; carbamoyl-phosphate synthase activity ; nitrogen compound metabolic process ; biosynthetic process	Glutamine amidotransferase superfamily ; Anthranilate synthase component II/delta crystallin ; Carbamoyl phosphate synthase, GATase region ; Glutamine amidotransferase class-I, C-terminal ; Carbamoyl phosphate synthase, small subunit, N-terminal ; Carbamoyl phosphate synthase, small subunit ; Glutamine amidotransferase, class I, active site ; Carbamoyl phosphate synthase, small subunit, N-terminal	KOG0370	Multifunctional pyrimidine synthesis protein CAD (includes carbamoyl-phophate synthetase, aspartate transcarbamylase, and glutamine amidotransferase)	General function prediction only	POORLY CHARACTERIZED
jgi|Oidma1|151713|	151638	1.01652	1	36.202	36.8	1.05886	0.958215	1.02548	1	0.968474	1	20.9853	22.2206	21.6685	1341	acid phosphatase activity	Histidine acid phosphatase	KOG1057	Arp2/3 complex-interacting protein VIP1/Asp1, involved in regulation of actin cytoskeleton	Cytoskeleton	CELLULAR PROCESSES AND SIGNALING
jgi|Oidma1|152069|	151994	1.18795	0.747213	25.5637	30.3683	1.03175	0.973849	1.07888	0.928266	1.04567	0.937822	30.2744	31.2358	28.9522	614	catalytic activity ; metabolic process ; long-chain-fatty-acid-CoA ligase activity ; fatty-acid ligase activity ; short-chain-fatty-acid-CoA ligase activity ; medium-chain-fatty-acid-CoA ligase activity ; very-long-chain-fatty-acid-CoA ligase activity	AMP-dependent synthetase and ligase ; AMP-dependent synthetase and ligase ; AMP-dependent synthetase and ligase	KOG1177	Long chain fatty acid acyl-CoA ligase	Lipid transport and metabolism	METABOLISM
jgi|Oidma1|152111|	152036	0.880579	0.645826	36.9495	32.5369	0.91276	0.979758	0.899734	1	0.98573	1	29.4728	26.9016	29.8995	1119	Rab GTPase activator activity ; intracellular ; regulation of Rab GTPase activity	RabGAP/TBC ; RabGAP/TBC ; RabGAP/TBC ; RabGAP/TBC	KOG4347	GTPase-activating protein VRP	General function prediction only	POORLY CHARACTERIZED
jgi|Oidma1|152495|	152420	0.92683	0.746286	77.2444	71.5924	0.991213	0.999362	0.901735	1	0.909729	0.851118	70.435	69.8161	77.4242	398	protein transporter activity ; protein transport ; integral to membrane ; integral to endoplasmic reticulum membrane	Translocation protein Sec62 ; Translocation protein Sec62, ascomycota	KOG2927	Membrane component of ER protein translocation complex	Intracellular trafficking, secretion, and vesicular transport	CELLULAR PROCESSES AND SIGNALING
jgi|Oidma1|152738|	152663	1.07162	0.91089	33.7032	36.1171	0.916805	0.978264	0.875288	0.993888	0.954716	0.997497	33.825	31.011	35.4294	1022	nucleosome ; DNA binding ; nucleus ; nucleosome assembly	GPI ethanolamine phosphate transferase 1, C-terminal ; Histone H2A ; Alkaline-phosphatase-like, core domain	KOG2124	Glycosylphosphatidylinositol anchor synthesis protein	Signal transduction mechanisms	CELLULAR PROCESSES AND SIGNALING
jgi|Oidma1|153440|	153365	1.07299	0.925307	39.8321	42.7395	1.01306	0.976946	1.0386	0.924238	1.02521	0.930207	57.1388	57.8851	55.7338	430	monooxygenase activity ; electron transport ; aromatic compound metabolic process ; metabolic process ; oxidoreductase activity	Aromatic-ring hydroxylase ; Monooxygenase, FAD-binding	KOG2614	Kynurenine 3-monooxygenase and related flavoprotein monooxygenases	Energy production and conversion	METABOLISM
jgi|Oidma1|154524|	154449	0.948188	0.734157	101.892	96.6123	0.890711	0.806547	0.914273	1	1.02645	0.887602	96.469	85.926	93.9829	370	protein modification process ; nucleus ; nucleotide-excision repair ; damaged DNA binding ; proteasomal ubiquitin-dependent protein catabolic process	UV excision repair protein Rad23, C-terminal ; Ubiquitin ; Ubiquitin-associated/translation elongation factor EF1B, N-terminal ; XPC-binding domain ; Ubiquitin-associated/translation elongation factor EF1B, N-terminal, eukaryote ; Ubiquitin ; Heat shock chaperonin-binding ; UV excision repair protein Rad23 ; Ubiquitin-associated/translation elongation factor EF1B, N-terminal, eukaryote ; Ubiquiti…	KOG0011	Nucleotide excision repair factor NEF2, RAD23 component	Replication, recombination and repair	INFORMATION STORAGE AND PROCESSING
jgi|Oidma1|154876|	154801	0.916165	0.398462	111.109	101.794	1.06511	0.768171	0.932005	1	0.875033	0.628422	85.746	91.3288	97.9918	683	protein kinase activity ; ATP binding ; protein amino acid phosphorylation ; protein-tyrosine kinase activity ; protein serine/threonine kinase activity	Protein kinase, core ; Serine/threonine protein kinase-related ; Tyrosine protein kinase ; Serine/threonine protein kinase ; Protein kinase, core ; Protein kinase ATP binding, conserved site ; Serine/threonine protein kinase, active site ; Protein kinase-like	KOG0671	LAMMER dual specificity kinases	Signal transduction mechanisms	CELLULAR PROCESSES AND SIGNALING
jgi|Oidma1|156343|	156268	1.08692	0.799789	291.12	316.424	1.00699	0.884312	0.933366	1	0.926889	0.70973	248.306	250.041	267.892	441	nucleic acid binding ; helicase activity ; ATP binding ; ATP-dependent helicase activity ; ATP-dependent DNA helicase activity ; ATP-dependent RNA helicase activity ; DNA-dependent ATPase activity ; RNA-dependent ATPase activity ; protein-transmembrane transporting ATPase activity ; ATPase activity ; single-stranded DNA-dependent ATP-dependent DNA helicase activity ; ATPase activity, coupled ; AT…	DNA/RNA helicase, DEAD/DEAH box type, N-terminal ; DNA/RNA helicase, C-terminal ; DEAD-like helicase, N-terminal ; DNA/RNA helicase, C-terminal ; Helicase, superfamily 1 and 2, ATP-binding ; DNA/RNA helicase, C-terminal ; RNA helicase, DEAD-box type, Q motif	KOG0329	ATP-dependent RNA helicase	RNA processing and modification	INFORMATION STORAGE AND PROCESSING
jgi|Oidma1|156597|	156522	1.15537	0.775526	124.859	144.258	1.10583	0.523722	1.01926	0.897487	0.921719	0.859391	100.953	111.636	109.526	446	catalytic activity ; polyamine biosynthetic process ; ornithine decarboxylase activity	Orn/DAP/Arg decarboxylase 2 ; Ornithine decarboxylase ; Orn/DAP/Arg decarboxylase 2 ; Orn/DAP/Arg decarboxylase 2 ; Orn/DAP/Arg decarboxylase 2 ; Orn/DAP/Arg decarboxylase 2 ; Alanine racemase/group IV decarboxylase, C-terminal	KOG0622	Ornithine decarboxylase	Amino acid transport and metabolism	METABOLISM
jgi|Oidma1|156926|	156851	1.03678	1	31.4185	32.5742	0.982881	1	0.995823	1	1.01317	0.973336	45.688	44.9058	45.0942	333	1-alkyl-2-acetylglycerophosphocholine esterase activity	WD40 repeat ; WD40 repeat ; WD40 repeat ; WD40 repeat ; WD40 repeat ; WD40 repeat ; WD40 repeat ; WD40 repeat-like	KOG0266	WD40 repeat-containing protein	General function prediction only	POORLY CHARACTERIZED
jgi|Oidma1|157214|	157139	0.977932	0.850833	69.1629	67.6365	1.04739	0.893775	1.0448	0.903929	0.997532	0.983493	59.7309	62.5615	59.8787	365	DNA binding ; zinc ion binding	Bromo adjacent region ; Bromo adjacent region ; Zinc finger, FYVE/PHD-type
jgi|Oidma1|157248|	157173	1.18258	0.215576	104.689	123.803	0.992293	0.997253	0.953229	1	0.960632	0.993082	90.9299	90.2292	94.6563	909	DNA binding ; DNA topoisomerase type I activity ; chromosome ; DNA topological change ; DNA unwinding during replication ; DNA topoisomerase (ATP-hydrolyzing) activity	DNA topoisomerase I, C-terminal ; DNA topoisomerase I, catalytic core, eukaryotic-type ; DNA topoisomerase I, DNA binding, eukaryotic-type ; DNA topoisomerase I, C-terminal, eukaryotic-type ; DNA topoisomerases I, dispensable insert, eukaryotic-type ; DNA breaking-rejoining enzyme, catalytic core ; DNA topoisomerase I, DNA binding, eukaryotic-type	KOG0981	DNA topoisomerase I	Replication, recombination and repair	INFORMATION STORAGE AND PROCESSING
jgi|Oidma1|157854|	157779	0.853912	0.697916	71.2148	60.8112	0.860611	0.746281	0.856035	0.903929	0.994683	0.986195	67.0303	57.687	67.3886	335	small conjugating protein ligase activity ; post-translational protein modification ; regulation of protein metabolic process ; ubiquitin-protein ligase activity ; regulation of ubiquitin-protein ligase activity ; regulation of ubiquitin-protein ligase activity during meiotic cell cycle ; positive regulation of ubiquitin-protein ligase activity ; negative regulation of ubiquitin-protein ligase ac…	Ubiquitin-conjugating enzyme, E2 ; Ubiquitin-conjugating enzyme, E2 ; Ubiquitin-conjugating enzyme, E2 ; Ubiquitin-conjugating enzyme, E2 ; Ubiquitin-conjugating enzyme/RWD-like	KOG0428	Non-canonical ubiquitin conjugating enzyme 1	Posttranslational modification, protein turnover, chaperones	CELLULAR PROCESSES AND SIGNALING
jgi|Oidma1|158379|	158304	0.87636	0.48415	42.9205	37.6138	1.08994	0.873013	0.980742	1	0.899816	0.907096	29.3904	32.0336	32.6627	457	lanosterol synthase activity	WD40 repeat ; WD40 repeat ; WD40 repeat ; Dynein regulator ; WD40 repeat ; WD40 repeat ; WD40 repeat ; LisH dimerisation motif ; WD40 repeat ; WD40 repeat-like	KOG0295	WD40 repeat-containing protein	Function unknown	POORLY CHARACTERIZED
jgi|Oidma1|158688|	158613	1.15335	0.692899	105.605	121.799	0.983693	1	1.09096	0.576092	1.10904	0.475665	118.102	116.176	106.49	457	metalloendopeptidase activity ; proteolysis ; membrane ; metallopeptidase activity ; zinc ion binding	Peptidase M48, Ste24p ; Peptidase M, neutral zinc metallopeptidases, zinc-binding site	KOG2719	Metalloprotease	General function prediction only	POORLY CHARACTERIZED
jgi|Oidma1|159205|	159130	0.93061	0.560867	86.5208	80.5171	1.00276	0.996043	0.939595	1	0.937013	0.965178	41.273	41.3867	44.0474	516	nucleotide binding ; phenylalanine-tRNA ligase activity ; ATP binding ; cytoplasm ; translation ; phenylalanyl-tRNA aminoacylation ; aminoacyl-tRNA ligase activity ; tRNA aminoacylation for protein translation ; phenylalanine-tRNA ligase complex	Phenylalanyl-tRNA synthetase, class IIc ; Phenylalanyl-tRNA synthetase, class IIc, alpha subunit ; Aminoacyl-tRNA synthetase, class II	KOG2784	Phenylalanyl-tRNA synthetase, beta subunit	Translation, ribosomal structure and biogenesis	INFORMATION STORAGE AND PROCESSING
jgi|Oidma1|159462|	159387	0.897788	0.744122	39.356	35.3333	0.913023	0.985541	0.932013	1	1.0208	0.972458	26.8584	24.5224	26.3112	474	histone deacetylase activity ; nucleus ; histone deacetylation ; acetylspermidine deacetylase activity	Histone deacetylase superfamily ; Histone deacetylase ; Histone deacetylase superfamily ; Histone deacetylase	KOG1342	Histone deacetylase complex, catalytic component RPD3	Chromatin structure and dynamics	INFORMATION STORAGE AND PROCESSING
jgi|Oidma1|159609|	159534	1.1037	0.886195	60.889	67.2029	0.985709	1	0.991179	1	1.00555	0.979664	35.4466	34.94	35.2509	579	metalloendopeptidase activity ; proteolysis ; zinc ion binding ; catalytic activity ; metal ion binding ; mitochondrial processing peptidase activity ; mitochondrial processing peptidase complex	Peptidase M16, N-terminal ; Peptidase M16, C-terminal ; Peptidase M16, zinc-binding site ; Metalloenzyme, LuxS/M16 peptidase-like, metal-binding	KOG2067	Mitochondrial processing peptidase, alpha subunit	Posttranslational modification, protein turnover, chaperones	CELLULAR PROCESSES AND SIGNALING
jgi|Oidma1|159928|	159853	0.851564	0.615242	32.0366	27.2812	0.937314	1	0.965001	1	1.02954	0.972819	19.0592	17.8645	18.5124	465	GTP binding ; microtubule ; microtubule-based process ; protein complex ; protein polymerization ; GTPase activity	Tubulin ; Gamma tubulin ; Tubulin/FtsZ, GTPase ; Tubulin/FtsZ, C-terminal ; Tubulin ; Tubulin/FtsZ, GTPase ; Tubulin/FtsZ, C-terminal	KOG1374	Gamma tubulin	Cytoskeleton	CELLULAR PROCESSES AND SIGNALING
jgi|Oidma1|16093|	16018	0.836655	0.712455	21.9432	18.3589	0.966373	1	1.09724	0.950083	1.13543	0.834553	17.7757	17.1779	15.6555	247	N-acetyltransferase activity ; metabolic process	GCN5-related N-acetyltransferase ; Acyl-CoA N-acyltransferase
jgi|Oidma1|161093|	161018	1.12111	0.686252	87.0936	97.6418	1.12027	0.674379	1.05209	0.893973	0.93914	0.961158	52.0881	58.3528	55.4637	505	protein kinase activity ; ATP binding ; protein amino acid phosphorylation ; protein serine/threonine kinase activity ; protein-tyrosine kinase activity ; phosphofructokinase activity ; phosphorylase kinase regulator activity ; cobinamide kinase activity ; phosphatidylinositol phosphate kinase activity ; cyclin-dependent protein kinase regulator activity ; phenol kinase activity ; cyclin-dependen…	Protein kinase, core ; Serine/threonine protein kinase-related ; Protein kinase, C-terminal ; Protein kinase, C-terminal ; Tyrosine protein kinase ; Serine/threonine protein kinase ; Protein kinase, core ; Serine/threonine protein kinase, active site ; Protein kinase-like	KOG0598	Ribosomal protein S6 kinase and related proteins	General function prediction only	POORLY CHARACTERIZED
jgi|Oidma1|161745|	161670	1.0363	1	38.927	40.3402	1.13185	0.80696	1.04446	0.974458	0.92279	0.957806	25.4903	28.8512	27.6231	479	vacuolar proton-transporting V-type ATPase, V1 domain ; peripheral to membrane of membrane fraction ; ATP binding ; hydrogen ion transporting ATPase activity, rotational mechanism ; binding ; hydrogen-transporting two-sector ATPase activity ; proton-transporting ATP synthase complex ; hydrogen ion transporting ATP synthase activity, rotational mechanism	ATPase, V1 complex, subunit H ; ATPase, V1 complex, subunit H ; Armadillo-type fold	KOG2759	Vacuolar H+-ATPase V1 sector, subunit H	Energy production and conversion	METABOLISM
jgi|Oidma1|162224|	162149	0.881966	0.663164	53.8294	47.4757	1.02361	0.970779	1.10355	0.820884	1.07809	0.833694	41.1503	42.1219	38.1695	474	RNA polymerase II transcription factor activity ; nucleus ; DNA repair ; regulation of transcription, DNA-dependent	Transcription factor Tfb2 ; Transcription factor Tfb2 ; Calycin-like	KOG3471	RNA polymerase II transcription initiation/nucleotide excision repair factor TFIIH, subunit TFB2	Transcription	INFORMATION STORAGE AND PROCESSING
jgi|Oidma1|162596|	162521	0.843496	0.0508125	149.59	126.179	0.913959	0.891022	0.963651	1	1.05437	0.743673	113.372	103.618	107.526	266	RNA binding ; translation initiation factor activity ; cytoplasm ; translational initiation	Eukaryotic translation initiation factor 4E (eIF-4E) ; Eukaryotic translation initiation factor 4E (eIF-4E) ; Eukaryotic translation initiation factor 4E (eIF-4E) ; Eukaryotic translation initiation factor 4E (eIF-4E)	KOG1670	Translation initiation factor 4F, cap-binding subunit (eIF-4E) and related cap-binding proteins	Translation, ribosomal structure and biogenesis	INFORMATION STORAGE AND PROCESSING
jgi|Oidma1|163138|	163063	0.845143	0.674171	50.9169	43.0321	0.982204	1	0.897167	1	0.913423	0.962712	18.2365	17.912	19.965	281	heat shock protein binding	Heat shock protein DnaJ, N-terminal ; Heat shock protein DnaJ, N-terminal ; Heat shock protein DnaJ, N-terminal ; Heat shock protein DnaJ, N-terminal	KOG0714	Molecular chaperone (DnaJ superfamily)	Posttranslational modification, protein turnover, chaperones	CELLULAR PROCESSES AND SIGNALING
jgi|Oidma1|163188|	163113	0.990953	0.953521	86.6545	85.8705	0.981832	1	1.04141	0.926282	1.06068	0.847797	122.769	120.538	115.746	184	oxidoreductase activity ; thioredoxin peroxidase activity ; secretory plant peroxidase activity ; bromide peroxidase activity	Redoxin ; Thioredoxin-like fold	KOG0541	Alkyl hydroperoxide reductase/peroxiredoxin	Posttranslational modification, protein turnover, chaperones	CELLULAR PROCESSES AND SIGNALING
jgi|Oidma1|163612|	163537	0.857419	0.503805	71.5033	61.3083	0.916938	0.93167	0.985933	1	1.07524	0.704792	85.3872	78.2948	79.4119	289	biosynthetic process ; nucleotidyltransferase activity ; NAD biosynthetic process ; nicotinamide-nucleotide adenylyltransferase activity	Cytidylyltransferase ; Probable nicotinate-nucleotide adenylyltransferase	KOG3199	Nicotinamide mononucleotide adenylyl transferase	Coenzyme transport and metabolism	METABOLISM
jgi|Oidma1|163847|	163772	1.05008	1	86.0345	90.3432	1.10911	0.811876	1.03755	0.969573	0.93548	0.970199	33.6787	37.3535	36.0015	1098	protein import into nucleus, docking ; nucleus ; nuclear pore ; cytoplasm ; intracellular protein transport ; protein transporter activity ; binding ; phosphatidylinositol 3-kinase, class I, catalyst activity ; phosphatidylinositol 3-kinase, class I, regulator activity ; 1-phosphatidylinositol-3-kinase activity	HEAT ; Importin-beta, N-terminal ; HEAT ; Importin-beta, N-terminal ; Armadillo-type fold	KOG2171	Karyopherin (importin) beta 3	Nuclear structure	CELLULAR PROCESSES AND SIGNALING
jgi|Oidma1|163958|	163883	0.854359	0.36914	39.3779	33.6428	1.09596	0.879451	1.07185	0.936146	0.977998	1	24.9576	27.3527	25.5191	919	DNA binding ; intracellular	AT-rich interaction region ; AT-rich interaction region ; AT-rich interaction region ; AT-rich interaction region	KOG2312	Predicted transcriptional regulator, contains ARID domain	Transcription	INFORMATION STORAGE AND PROCESSING
jgi|Oidma1|164264|	164189	1.06569	0.976296	47.1897	50.2897	1.06417	0.87725	0.971401	1	0.912823	0.903501	46.0378	48.9922	50.4346	409	hydrolase activity ; phosphoprotein phosphatase activity ; calcium-dependent protein serine/threonine phosphatase activity ; magnesium-dependent protein serine/threonine phosphatase activity ; magnesium-dependent protein serine/threonine phosphatase complex ; CTD phosphatase activity ; calcium-dependent protein serine/threonine phosphatase regulator activity ; myosin phosphatase activity ; myosin…	Serine/threonine-specific protein phosphatase and bis(5-nucleosyl)-tetraphosphatase ; Serine/threonine-specific protein phosphatase and bis(5-nucleosyl)-tetraphosphatase ; Metallophosphoesterase ; Serine/threonine-specific protein phosphatase and bis(5-nucleosyl)-tetraphosphatase ; Serine/threonine-specific protein phosphatase and bis(5-nucleosyl)-tetraphosphatase	KOG0373	Serine/threonine specific protein phosphatase involved in cell cycle control, PP2A-related	Signal transduction mechanisms	CELLULAR PROCESSES AND SIGNALING
jgi|Oidma1|164373|	164298	0.965845	0.756867	67.6672	65.356	0.968686	1	0.881855	0.971201	0.910362	0.866507	63.1632	61.1854	69.3826	720	integral to membrane	Nonaspanin (TM9SF)	KOG1278	Endosomal membrane proteins, EMP70	Intracellular trafficking, secretion, and vesicular transport	CELLULAR PROCESSES AND SIGNALING
jgi|Oidma1|164610|	164535	0.944765	0.763204	86.8476	82.0506	1.0383	0.938255	1.05497	0.907456	1.01606	0.937822	68.342	70.9595	67.262	417	amino acid metabolic process ; transaminase activity ; catalytic activity ; biosynthetic process ; pyridoxal phosphate binding ; transferase activity, transferring nitrogenous groups ; aspartate transaminase activity	Aspartate/other aminotransferase ; Aminotransferase, class I and II ; Aminotransferases, class-I, pyridoxal-phosphate-binding site ; Pyridoxal phosphate-dependent transferase, major region	KOG1412	Aspartate aminotransferase/Glutamic oxaloacetic transaminase AAT2/GOT1	Amino acid transport and metabolism	METABOLISM
jgi|Oidma1|164612|	164537	0.881844	0.608286	49.7196	43.8449	0.917032	0.96866	1.03557	0.959047	1.12926	0.661534	48.9244	44.8653	43.3244	353	protein binding ; membrane ; vesicle-mediated transport	t-SNARE	KOG3894	SNARE protein Syntaxin 18/UFE1	Intracellular trafficking, secretion, and vesicular transport	CELLULAR PROCESSES AND SIGNALING
jgi|Oidma1|164780|	164705	1.07525	0.972459	21.618	23.2448	0.899025	0.982805	0.986905	1	1.09775	0.891738	18.2776	16.432	16.65	626	protein kinase activity ; ATP binding ; protein amino acid phosphorylation ; protein-tyrosine kinase activity ; protein serine/threonine kinase activity ; phosphofructokinase activity ; phosphorylase kinase regulator activity ; cobinamide kinase activity ; phosphatidylinositol phosphate kinase activity ; cyclin-dependent protein kinase regulator activity ; phenol kinase activity ; cyclin-dependen…	Protein kinase, core ; Serine/threonine protein kinase-related ; Tyrosine protein kinase ; Serine/threonine protein kinase ; Protein kinase, core ; Protein kinase ATP binding, conserved site ; Serine/threonine protein kinase, active site ; Protein kinase-like	KOG1035	eIF-2alpha kinase GCN2	Translation, ribosomal structure and biogenesis	INFORMATION STORAGE AND PROCESSING
jgi|Oidma1|164909|	164834	1.19826	0.492924	108.721	130.276	1.02335	0.942295	1.14854	0.485655	1.12233	0.469609	94.7079	96.9197	84.3853	400	tRNA binding	tRNA-binding region ; tRNA-binding region ; Glutathione S-transferase, C-terminal-like ; Nucleic acid-binding, OB-fold-like	KOG2241	tRNA-binding protein	Translation, ribosomal structure and biogenesis	INFORMATION STORAGE AND PROCESSING
jgi|Oidma1|164933|	164858	1.03575	1	47.017	48.6979	0.949883	1	0.917066	1	0.965451	1	33.0478	31.3916	34.2304	533	hexokinase activity ; ATP binding ; glycolysis	Hexokinase ; Hexokinase ; Hexokinase ; Hexokinase	KOG1369	Hexokinase	Carbohydrate transport and metabolism	METABOLISM
jgi|Oidma1|165120|	165045	0.908507	0.735527	96.1887	87.3882	0.935013	0.987003	0.850265	0.867018	0.909362	0.848505	69.8292	65.2912	76.7892	329	hydrolase activity ; phosphoprotein phosphatase activity ; calcium-dependent protein serine/threonine phosphatase activity ; magnesium-dependent protein serine/threonine phosphatase activity ; magnesium-dependent protein serine/threonine phosphatase complex ; CTD phosphatase activity ; calcium-dependent protein serine/threonine phosphatase regulator activity ; myosin phosphatase activity ; myosin…	Serine/threonine-specific protein phosphatase and bis(5-nucleosyl)-tetraphosphatase ; Serine/threonine-specific protein phosphatase and bis(5-nucleosyl)-tetraphosphatase ; Metallophosphoesterase ; Serine/threonine-specific protein phosphatase and bis(5-nucleosyl)-tetraphosphatase ; Serine/threonine-specific protein phosphatase and bis(5-nucleosyl)-tetraphosphatase	KOG0371	Serine/threonine protein phosphatase 2A, catalytic subunit	Signal transduction mechanisms	CELLULAR PROCESSES AND SIGNALING
jgi|Oidma1|166080|	166005	0.880992	0.375123	133.822	117.896	1.03469	0.868906	1.03009	0.864061	0.995552	0.974419	106.593	110.291	107.07	448	GTP binding ; microtubule ; microtubule-based process ; structural molecule activity ; microtubule-based movement ; protein complex ; protein polymerization ; GTPase activity	Tubulin ; Beta tubulin ; Tubulin/FtsZ, GTPase ; Tubulin/FtsZ, C-terminal ; Tubulin ; Beta tubulin, autoregulation binding site ; Tubulin/FtsZ, GTPase ; Tubulin/FtsZ, C-terminal	KOG1375	Beta tubulin	Cytoskeleton	CELLULAR PROCESSES AND SIGNALING
jgi|Oidma1|166470|	166395	0.970435	0.854011	96.4241	93.5733	0.918576	0.94371	1.06181	0.83355	1.15593	0.417495	76.5566	70.323	66.2296	390	nucleotide binding ; nucleoside-triphosphatase activity ; ATP binding ; nucleus ; cytoplasm ; hydrolase activity ; protein catabolic process	AAA ATPase, core ; AAA+ ATPase, core ; 26S proteasome subunit P45 ; AAA ATPase, conserved site	KOG0728	26S proteasome regulatory complex, ATPase RPT6	Posttranslational modification, protein turnover, chaperones	CELLULAR PROCESSES AND SIGNALING
jgi|Oidma1|167042|	166967	0.817087	0.447652	42.6522	34.8505	0.99905	0.999599	0.898511	1	0.899366	0.881333	32.2576	32.227	35.8671	353	catalytic activity ; binding ; metabolic process	Male sterility, NAD-binding ; NAD(P)-binding	KOG1502	Flavonol reductase/cinnamoyl-CoA reductase	Defense mechanisms	CELLULAR PROCESSES AND SIGNALING
jgi|Oidma1|167417|	167342	1.14531	0.870616	207.883	238.091	0.94954	0.971314	0.90342	0.895177	0.951429	0.908343	326.335	309.868	342.994	298	metabolic process ; oxidoreductase activity ; catalytic activity ; binding ; carbonyl reductase (NADPH) activity	Short-chain dehydrogenase/reductase SDR ; Glucose/ribitol dehydrogenase ; Short-chain dehydrogenase/reductase SDR ; NAD(P)-binding	KOG1208	Dehydrogenases with different specificities (related to short-chain alcohol dehydrogenases)	Secondary metabolites biosynthesis, transport and catabolism	METABOLISM
jgi|Oidma1|167943|	167868	1.16011	0.709412	27.4553	31.8512	0.984265	1	1.08038	0.970802	1.09765	0.887128	18.4588	18.1684	16.8166	694	dynein ATPase activity	WD40 repeat ; WD40 repeat ; WD40 repeat ; WD40 repeat ; WD40 repeat-like	KOG1587	Cytoplasmic dynein intermediate chain	Cytoskeleton	CELLULAR PROCESSES AND SIGNALING
jgi|Oidma1|168446|	168371	0.924475	0.16489	223.506	206.625	1.04564	0.877861	0.937211	1	0.896306	0.800829	111.898	117.004	124.843	623	heme binding ; transition metal ion binding ; electron transport ; oxidoreductase activity ; succinate dehydrogenase activity	Cytochrome b5 ; Cytochrome b5 ; Fumarate reductase/succinate dehydrogenase flavoprotein, N-terminal ; Flavocytochrome c ; Cytochrome b5 ; Cytochrome b5	KOG2404	Fumarate reductase, flavoprotein subunit	Energy production and conversion	METABOLISM
jgi|Oidma1|168975|	168900	0.931179	0.702364	41.3099	38.4669	0.928738	0.994065	0.872957	0.989162	0.939939	0.975515	34.666	32.1957	36.8812	859	transcription factor activity ; nucleus ; regulation of transcription, DNA-dependent ; zinc ion binding ; DNA binding ; transcription	Fungal transcriptional regulatory protein, N-terminal ; Fungal specific transcription factor ; Fungal transcriptional regulatory protein, N-terminal ; Fungal transcriptional regulatory protein, N-terminal ; Fungal transcriptional regulatory protein, N-terminal ; Fungal transcriptional regulatory protein, N-terminal
jgi|Oidma1|16990|	16915	0.904861	0.611534	112.267	101.586	0.95367	1	0.905721	1	0.949722	0.972022	86.3893	82.3869	90.9628	386	metabolic process ; alanine-glyoxylate transaminase activity	Aminotransferase, class V/Cysteine desulphurase ; Pyridoxal phosphate-dependent transferase, major region	KOG2862	Alanine-glyoxylate aminotransferase AGT1	General function prediction only	POORLY CHARACTERIZED
jgi|Oidma1|170820|	170745	0.992608	0.92113	87.9322	87.2822	0.993953	0.995645	1.06136	0.833958	1.06782	0.789587	76.3751	75.9132	71.5244	874	transcription factor activity ; nucleus ; regulation of transcription, DNA-dependent ; zinc ion binding ; DNA binding ; transcription	Fungal transcriptional regulatory protein, N-terminal ; Fungal specific transcription factor ; Fungal transcriptional regulatory protein, N-terminal ; Fungal transcriptional regulatory protein, N-terminal ; Fungal transcriptional regulatory protein, N-terminal
jgi|Oidma1|171259|	171184	0.817494	0.824953	15.8251	12.9369	1.03569	0.995879	0.966654	1	0.933346	0.968477	26.8519	27.8102	28.7696	378	calcium ion binding	Calcium-binding EF-hand
jgi|Oidma1|17127|	17052	0.851747	0.108299	192.9	164.302	0.867332	0.524711	0.981618	0.993836	1.13177	0.24757	157.782	136.849	139.412	330	catalytic activity ; metabolic process ; binding ; ATP citrate synthase activity ; succinate-CoA ligase (ADP-forming) activity ; succinate-CoA ligase (GDP-forming) activity ; succinate-CoA ligase complex ; succinate-CoA ligase complex (GDP-forming)	Succinyl-CoA ligase, alpha subunit ; ATP-citrate lyase/succinyl-CoA ligase ; CoA-binding ; Succinyl-CoA ligase, alpha subunit ; Succinyl-CoA ligase, alpha subunit ; ATP-citrate lyase/succinyl-CoA ligase, active site ; Succinyl-CoA ligase, alpha subunit ; NAD(P)-binding ; Succinyl-CoA synthetase-like	KOG1255	Succinyl-CoA synthetase, alpha subunit	Energy production and conversion	METABOLISM
jgi|Oidma1|171843|	171768	1.08992	0.919154	29.9972	32.6946	1.08664	0.893775	1.11277	0.880762	1.02404	0.969793	25.3368	27.532	24.7419	560	protein binding ; zinc ion binding ; ATP-dependent peptidase activity ; ATP-dependent proteolysis	Zinc finger, RING-type ; Peptidase S16, lon N-terminal ; Zinc finger, RING-type ; Peptidase S16, lon N-terminal ; Zinc finger, RING-type ; Zinc finger, RING-type	KOG4159	Predicted E3 ubiquitin ligase	Posttranslational modification, protein turnover, chaperones	CELLULAR PROCESSES AND SIGNALING
jgi|Oidma1|171921|	171846	1.10866	0.805981	36.4626	40.4248	1.14428	0.805262	1.09451	0.916726	0.956503	1	22.7967	26.0857	23.8333	1608	protein kinase activity ; ATP binding ; protein amino acid phosphorylation ; protein-tyrosine kinase activity ; protein serine/threonine kinase activity ; nucleotide binding ; aminoacyl-tRNA ligase activity ; cytoplasm ; translation ; tRNA aminoacylation for protein translation ; protein binding ; regulation of translational initiation ; transmembrane receptor protein serine/threonine kinase acti…	Protein kinase, core ; Serine/threonine protein kinase-related ; Aminoacyl-tRNA synthetase, class II (G, H, P and S) ; Anticodon-binding ; RWD ; Serine/threonine-protein kinase, GCN2 ; Tyrosine protein kinase ; Serine/threonine protein kinase ; RWD ; Protein kinase, core ; RWD ; Protein kinase ATP binding, conserved site ; Serine/threonine protein kinase, active site ; Anticodon-binding ; Ubiquit…	KOG1035	eIF-2alpha kinase GCN2	Translation, ribosomal structure and biogenesis	INFORMATION STORAGE AND PROCESSING
jgi|Oidma1|172187|	172112	1.14145	0.689649	32.5517	37.1562	0.853723	0.779582	1.00311	1	1.17498	0.521071	50.42	43.0447	42.9114	379	protein binding ; cell communication ; phosphoinositide binding	Phox-like ; Target SNARE coiled-coil region ; Phox-like ; Target SNARE coiled-coil region ; Target SNARE coiled-coil region ; Phox-like ; Phox-like	KOG3202	SNARE protein TLG1/Syntaxin 6	Intracellular trafficking, secretion, and vesicular transport	CELLULAR PROCESSES AND SIGNALING
jgi|Oidma1|172289|	172214	1.03941	1	69.4584	72.1961	0.975546	1	1.13222	0.59368	1.16061	0.632887	68.0532	66.389	58.6359	607	protein binding	Leucine-rich repeat ; Cyclin-like F-box ; Leucine-rich repeat 2 ; Leucine-rich repeat, cysteine-containing subtype	KOG1947	Leucine rich repeat proteins, some proteins contain F-box	General function prediction only	POORLY CHARACTERIZED
jgi|Oidma1|173725|	173650	1.15161	0.801919	79.8227	91.9245	0.922983	0.976946	0.906164	1	0.981778	1	45.9312	42.3937	46.7836	780	metabolic process ; homoaconitate hydratase activity ; lysine biosynthetic process ; 4 iron, 4 sulfur cluster binding	Aconitase/3-isopropylmalate dehydratase large subunit, alpha/beta/alpha ; Aconitase/3-isopropylmalate dehydratase large subunit, alpha/beta/alpha ; Aconitase/3-isopropylmalate dehydratase large subunit, alpha/beta/alpha ; Aconitase A/isopropylmalate dehydratase small subunit, swivel ; Homoaconitase, mitochondrial ; Aconitase/3-isopropylmalate dehydratase large subunit, alpha/beta/alpha ; Aconitas…	KOG0453	Aconitase/homoaconitase (aconitase superfamily)	Amino acid transport and metabolism	METABOLISM
jgi|Oidma1|174504|	174429	0.959836	0.804845	224.314	215.305	1.01764	0.873637	0.965965	1	0.949216	0.978599	170.545	173.554	179.669	410	metabolic process ; oxidoreductase activity, acting on the aldehyde or oxo group of donors, disulfide as acceptor ; pyruvate dehydrogenase (acetyl-transferring) activity	Dehydrogenase, E1 component ; Pyruvate dehydrogenase (acetyl-transferring) E1 component, alpha subunit, subgroup y	KOG0225	Pyruvate dehydrogenase E1, alpha subunit	Energy production and conversion	METABOLISM
jgi|Oidma1|174709|	174634	1.06677	0.926572	42.0764	44.8858	0.991155	1	0.914551	1	0.922713	0.928605	37.6792	37.346	40.8353	664	zinc ion binding	Zinc finger, DHHC-type ; Zinc finger, DHHC-type ; Zinc finger, DHHC-type	KOG1311	DHHC-type Zn-finger proteins	General function prediction only	POORLY CHARACTERIZED
jgi|Oidma1|175009|	174934	1.05914	0.885008	127.725	135.278	0.951378	0.990834	1.09437	0.842568	1.1503	0.60604	232.178	220.889	201.841	307	transporter activity ; binding ; transport	Src homology-3 ; Src homology-3 ; Src homology-3 ; Src homology-3 ; Src homology-3 ; Lipocalin ; Src homology-3	KOG0197	Tyrosine kinases	Signal transduction mechanisms	CELLULAR PROCESSES AND SIGNALING
jgi|Oidma1|176049|	175974	0.975469	0.878119	57.8438	56.4249	0.87098	0.831812	0.868504	0.942216	0.997157	0.995506	52.5855	45.8009	52.7355	689	catalytic activity ; metal ion binding ; 4 iron, 4 sulfur cluster binding ; Mo-molybdopterin cofactor biosynthetic process ; iron-sulfur cluster binding ; molybdopterin synthase complex	Molybdopterin cofactor biosynthesis MoaC region ; Molybdopterin cofactor biosynthesis MoaC region ; Radical SAM ; Molybdenum cofactor synthesis C-terminal ; Elongator protein 3/MiaB/NifB ; Molybdopterin cofactor biosynthesis MoaC region ; Molybdenum cofactor biosynthesis protein A ; MoaA/nifB/pqqE, iron-sulphur binding, conserved site ; Molybdopterin cofactor biosynthesis MoaC region	KOG2876	Molybdenum cofactor biosynthesis pathway protein	Coenzyme transport and metabolism	METABOLISM
jgi|Oidma1|176268|	176193	0.875188	0.484219	65.4785	57.306	0.972232	1	0.910577	1	0.936584	0.942616	67.6758	65.7966	72.2582	433	Golgi membrane ; sugar:hydrogen symporter activity ; carbohydrate transport ; integral to membrane	Nucleotide-sugar transporter ; Uncharacterised conserved protein UCP036436, nucleotide-sugar transporter-related	KOG3912	Predicted integral membrane protein	General function prediction only	POORLY CHARACTERIZED
jgi|Oidma1|17713|	17638	1.02473	1	96.3781	98.7619	0.975604	1	1.04516	0.710881	1.0713	0.56899	154.844	151.066	144.538	323	thiamin biosynthetic process	Thiamine biosynthesis Thi4 protein ; Thiamine biosynthesis Thi4 protein	KOG2960	Protein involved in thiamine biosynthesis and DNA damage tolerance	General function prediction only	POORLY CHARACTERIZED
jgi|Oidma1|177675|	177600	1.01617	1	157.868	160.421	0.890314	0.619113	0.96797	1	1.08722	0.3967	208.364	185.509	191.648	332	protein binding ; nutrient reservoir activity ; DNA-directed DNA polymerase activity ; DNA polymerase activity	HMW glutenin ; WW/Rsp5/WWP ; WW/Rsp5/WWP	KOG4297	C-type lectin	Signal transduction mechanisms	CELLULAR PROCESSES AND SIGNALING
jgi|Oidma1|178393|	178318	1.09219	0.91062	44.8693	49.0058	1.06435	0.893775	1.10597	0.814964	1.0391	0.918734	41.2053	43.8569	39.6546	946	nucleic acid binding ; intracellular ; zinc ion binding	Zinc finger, C2H2-type ; Zinc finger, C2H2-like ; Zinc finger, C2H2-type ; Zinc finger, C2H2-type	KOG1721	FOG: Zn-finger	General function prediction only	POORLY CHARACTERIZED
jgi|Oidma1|178634|	178559	1.10107	0.792989	57.1511	62.9272	0.939898	0.997064	0.971823	1	1.03397	0.919123	48.5048	45.5895	46.9114	374	metabolic process ; L-serine biosynthetic process ; phosphoserine transaminase activity	Phosphoserine aminotransferase ; Aminotransferase, class V/Cysteine desulphurase ; Pyridoxal phosphate-dependent transferase, major region	KOG2790	Phosphoserine aminotransferase	Coenzyme transport and metabolism	METABOLISM
jgi|Oidma1|178990|	178915	1.0502	0.963646	76.111	79.9316	1.00883	0.987463	1.12219	0.620999	1.11237	0.688729	69.5072	70.1208	62.4856	377	proteolysis ; serine-type peptidase activity ; membrane	Peptidase S26A, signal peptidase I
jgi|Oidma1|179104|	179029	0.888072	0.691681	87.3645	77.586	1.00129	0.990834	0.9596	1	0.958361	0.993408	62.4757	62.5564	65.1901	302	metabolic process ; transferase activity ; phosphoadenylyl-sulfate reductase (thioredoxin) activity ; sulfate assimilation, phosphoadenylyl sulfate reduction by phosphoadenylyl-sulfate reductase (thioredoxin) ; cysteine biosynthetic process	Phosphoadenosine phosphosulphate reductase ; Phosphoadenosine phosphosulphate reductase CysH-type ; Phosphoadenosine phosphosulphate reductase thioredoxin	KOG0189	Phosphoadenosine phosphosulfate reductase	Amino acid transport and metabolism	METABOLISM
jgi|Oidma1|179529|	179454	0.816871	0.508523	42.8452	34.999	0.945568	1	1.08229	0.954641	1.14459	0.791829	21.7768	20.5914	19.0259	619	transcription factor activity ; nucleus ; regulation of transcription, DNA-dependent ; zinc ion binding ; DNA binding ; transcription	Fungal transcriptional regulatory protein, N-terminal ; Fungal specific transcription factor ; Fungal transcriptional regulatory protein, N-terminal ; Fungal transcriptional regulatory protein, N-terminal ; Fungal transcriptional regulatory protein, N-terminal ; Fungal transcriptional regulatory protein, N-terminal
jgi|Oidma1|180228|	180153	0.868248	0.383033	97.5803	84.7239	0.994758	0.998996	1.00153	0.993888	1.0068	0.969297	55.6289	55.3372	55.253	486	threonine endopeptidase activity ; proteasome endopeptidase activity	Proteasome component region PCI ; Proteasome component region PCI	KOG0687	26S proteasome regulatory complex, subunit RPN7/PSMD6	Posttranslational modification, protein turnover, chaperones	CELLULAR PROCESSES AND SIGNALING
jgi|Oidma1|180348|	180273	1.03081	1	50.3699	51.9218	0.978211	1	0.905883	1	0.926061	0.964288	24.8239	24.283	26.8059	1080	nucleotide binding ; aminoacyl-tRNA ligase activity ; ATP binding ; cytoplasm ; translation ; tRNA aminoacylation for protein translation ; isoleucine-tRNA ligase activity ; isoleucyl-tRNA aminoacylation	Isoleucyl-tRNA synthetase, class Ia, N-terminal ; Aminoacyl-tRNA synthetase, class Ia ; Valyl/Leucyl/Isoleucyl-tRNA synthetase, class I, anticodon-binding ; Isoleucyl-tRNA synthetase, class Ia ; Aminoacyl-tRNA synthetase, class I, conserved site ; Aminoacyl-tRNA synthetase, class 1a, anticodon-binding ; Valyl/Leucyl/Isoleucyl-tRNA synthetase, class Ia, editing	KOG0434	Isoleucyl-tRNA synthetase	Translation, ribosomal structure and biogenesis	INFORMATION STORAGE AND PROCESSING
jgi|Oidma1|182134|	182059	0.993915	0.839917	101.007	100.392	1.04771	0.876257	1.0978	0.726309	1.04781	0.864657	63.041	66.0487	60.1648	581	translation initiation factor activity ; translational initiation ; hydrolase activity	Eukaryotic translation initiation factor 3, subunit 7 ; Eukaryotic translation initiation factor 3, subunit 7 ; NUDIX	KOG2479	Translation initiation factor 3, subunit d (eIF-3d)	Translation, ribosomal structure and biogenesis	INFORMATION STORAGE AND PROCESSING
jgi|Oidma1|182438|	182363	1.0209	1	27.0799	27.646	0.937792	1	0.892293	1	0.951483	0.988818	20.329	19.0644	21.3656	544	protein kinase activity ; ATP binding ; protein amino acid phosphorylation ; protein-tyrosine kinase activity ; protein serine/threonine kinase activity ; protein kinase CK2 activity	Protein kinase, core ; Serine/threonine protein kinase-related ; Tyrosine protein kinase ; Serine/threonine protein kinase ; Protein kinase, core ; Protein kinase ATP binding, conserved site ; Serine/threonine protein kinase, active site ; Protein kinase-like	KOG0590	Checkpoint kinase and related serine/threonine protein kinases	Cell cycle control, cell division, chromosome partitioning	METABOLISM
jgi|Oidma1|182867|	182792	0.997915	0.988704	25.7511	25.6974	1.07433	0.938811	1.11921	0.860116	1.04177	0.959115	27.4704	29.5123	26.3689	396	catalytic activity	Alpha/beta hydrolase fold-1 ; Lipase, active site	KOG1552	Predicted alpha/beta hydrolase	General function prediction only	POORLY CHARACTERIZED
jgi|Oidma1|183510|	183435	0.958923	0.866357	83.0771	79.6645	0.919293	0.966071	0.865646	0.92981	0.941643	0.951706	55.2939	50.8313	58.7206	880	Rab GTPase activator activity ; intracellular ; regulation of Rab GTPase activity	RabGAP/TBC ; RabGAP/TBC ; RabGAP/TBC ; RabGAP/TBC	KOG2197	Ypt/Rab-specific GTPase-activating protein GYP7 and related proteins	Signal transduction mechanisms	CELLULAR PROCESSES AND SIGNALING
jgi|Oidma1|184148|	184073	0.863733	0.527515	26.6019	22.9769	0.997319	1	1.04313	0.978017	1.04593	0.933056	26.7709	26.6991	25.5953	836	DNA binding ; regulation of transcription, DNA-dependent	DNA-binding RFX	KOG3712	RFX family transcription factor	Transcription	INFORMATION STORAGE AND PROCESSING
jgi|Oidma1|184189|	184114	1.07358	0.916484	43.598	46.8059	1.07793	0.90862	0.985904	1	0.91463	0.934768	31.3929	33.8393	34.3231	963	protein import into nucleus, docking ; nucleus ; nuclear pore ; cytoplasm ; intracellular protein transport ; protein transporter activity ; apoptosis ; importin-alpha export receptor activity ; cell proliferation ; binding	CAS/CSE, C-terminal ; Importin-beta, N-terminal ; Exportin, Cse1-like ; Importin-beta, N-terminal ; Armadillo-type fold	KOG1992	Nuclear export receptor CSE1/CAS (importin beta superfamily)	Nuclear structure	CELLULAR PROCESSES AND SIGNALING
jgi|Oidma1|186448|	186373	1.11974	0.870126	75.8906	84.9779	0.995918	1	1.03118	0.976519	1.03541	0.906619	68.7567	68.4761	66.4054	493	threonine endopeptidase activity ; proteasome endopeptidase activity	Proteasome component region PCI ; Proteasome component region PCI ; PCI/PINT associated module	KOG1464	COP9 signalosome, subunit CSN2	Posttranslational modification, protein turnover, chaperones	CELLULAR PROCESSES AND SIGNALING
jgi|Oidma1|186564|	186489	0.996521	0.95194	52.2935	52.1116	1.05983	0.86924	1.09407	0.78517	1.0323	0.916731	53.322	56.5124	51.6534	589	intracellular ; signal transduction ; protein kinase CK2 activity	RhoGAP ; RhoGAP ; RhoGAP ; Rho GTPase activation protein	KOG1450	Predicted Rho GTPase-activating protein	Signal transduction mechanisms	CELLULAR PROCESSES AND SIGNALING
jgi|Oidma1|186765|	186690	1.06038	0.90902	76.8259	81.4648	1.0555	0.882157	0.936516	1	0.887274	0.799469	53.6503	56.6278	60.4665	877	protein binding ; zinc ion binding	Zinc finger, RING-type ; Protease-associated PA ; Zinc finger, RING-type ; Zinc finger, RING-type	KOG4628	Predicted E3 ubiquitin ligase	Posttranslational modification, protein turnover, chaperones	CELLULAR PROCESSES AND SIGNALING
jgi|Oidma1|187302|	187227	1.00199	0.952267	84.6768	84.8454	1.07668	0.800721	1.07176	0.823315	0.995436	0.985457	57.5773	61.9921	57.8413	1045	protein import into nucleus, docking ; nucleus ; nuclear pore ; cytoplasm ; intracellular protein transport ; protein transporter activity ; binding	Importin-beta, N-terminal ; Importin-beta, N-terminal ; Armadillo-type fold	KOG1991	Nuclear transport receptor RANBP7/RANBP8 (importin beta superfamily)	Nuclear structure	CELLULAR PROCESSES AND SIGNALING
jgi|Oidma1|187435|	187360	1.08101	0.917093	37.229	40.245	0.860457	0.799808	0.96703	1	1.12386	0.653575	62.965	54.1787	56.0259	481	cholinesterase activity	Carboxylesterase, type B ; Carboxylesterase, type B	KOG4389	Acetylcholinesterase/Butyrylcholinesterase	Signal transduction mechanisms	CELLULAR PROCESSES AND SIGNALING
jgi|Oidma1|187501|	187426	0.919969	0.622364	118.415	108.938	0.938382	0.983351	1.00738	0.960303	1.07353	0.698844	89.1466	83.6535	83.0408	487	ARF GTPase activator activity ; zinc ion binding ; regulation of ARF GTPase activity	Arf GTPase activating protein ; Arf GTPase activating protein ; Arf GTPase activating protein ; Arf GTPase activating protein ; Arf GTPase activating protein	KOG0706	Predicted GTPase-activating protein	Signal transduction mechanisms	CELLULAR PROCESSES AND SIGNALING
jgi|Oidma1|187599|	187524	0.811004	0.0285388	258.454	209.607	1.03665	0.781102	1.04	0.722828	1.00323	0.935865	152.271	157.851	151.78	471	Rab GDP-dissociation inhibitor activity ; protein transport ; regulation of GTPase activity	Rab GTPase activator ; Rab GDI protein ; Rab GTPase activator	KOG1439	RAB proteins geranylgeranyltransferase component A (RAB escort protein)	Posttranslational modification, protein turnover, chaperones	CELLULAR PROCESSES AND SIGNALING
jgi|Oidma1|187658|	187583	1.01313	1	45.1458	45.7386	1.11188	0.870092	1.08318	0.933441	0.974183	1	22.0515	24.5187	22.6359	930	ATP-dependent peptidase activity ; serine-type endopeptidase activity ; proteolysis ; ATP-dependent proteolysis ; nucleotide binding ; nucleoside-triphosphatase activity ; ATP binding ; subtilase activity ; pancreatic elastase activity ; plasminogen activator activity ; serine-type signal peptidase activity ; proprotein convertase activity	Peptidase S16, Lon protease ; AAA ATPase, core ; Peptidase S16, lon N-terminal ; Peptidase S16, lon C-terminal ; AAA+ ATPase, core ; Peptidase S16, lon N-terminal ; Peptidase S16, ATP-dependent protease La ; Peptidase S16, active site	KOG2004	Mitochondrial ATP-dependent protease PIM1/LON	Posttranslational modification, protein turnover, chaperones	CELLULAR PROCESSES AND SIGNALING
jgi|Oidma1|187801|	187726	1.07	1	75.6991	80.9981	1.04902	0.909605	1.10471	0.779875	1.05308	0.873005	49.4449	51.8689	46.9526	652	GTP binding	Nucleolar GTP-binding 1 ; NOG, C-terminal	KOG1490	GTP-binding protein CRFG/NOG1 (ODN superfamily)	General function prediction only	POORLY CHARACTERIZED
jgi|Oidma1|188229|	188154	1.04859	0.997546	41.749	43.7776	1.07096	0.887277	1.11268	0.820528	1.03896	0.929641	35.472	37.9891	34.1419	480	intracellular transport	Ran Binding Protein 1 ; Ran Binding Protein 1 ; Ran Binding Protein 1	KOG0864	Ran-binding protein RANBP1 and related RanBD domain proteins	Intracellular trafficking, secretion, and vesicular transport	CELLULAR PROCESSES AND SIGNALING
jgi|Oidma1|18844|	18769	1.17856	0.377122	392.328	462.381	0.863838	0.198405	0.899936	0.874392	1.04179	0.527767	349.18	301.635	335.174	230	translation elongation factor activity ; eukaryotic translation elongation factor 1 complex ; translational elongation	Translation elongation factor EF1B, beta and delta chains, guanine nucleotide exchange ; Translation elongation factor EF1B, beta/delta chains, conserved site ; Translation elongation factor EF1B, beta/delta chains, conserved site ; Glutathione S-transferase, C-terminal-like ; Translation elongation factor EF1B, beta and delta chains, guanine nucleotide exchange	KOG1668	Elongation factor 1 beta/delta chain	Transcription	INFORMATION STORAGE AND PROCESSING
jgi|Oidma1|18847|	18772	1.04436	0.981613	736.587	769.26	1.05796	0.761268	1.05881	0.750923	1.00081	0.815035	633.685	670.41	633.173	184	GTP binding ; small GTPase mediated signal transduction ; protein transport ; intracellular ; intracellular protein transport	ARF/SAR superfamily ; Ras GTPase ; ARF/SAR superfamily ; Ras small GTPase, Rab type ; ADP-ribosylation factor ; GTP-binding protein SAR1 ; Small GTP-binding protein ; ADP-ribosylation factor	KOG0070	GTP-binding ADP-ribosylation factor Arf1	Intracellular trafficking, secretion, and vesicular transport	CELLULAR PROCESSES AND SIGNALING
jgi|Oidma1|188945|	188870	1.12861	0.846749	43.2978	48.8663	0.941451	0.998996	0.887584	0.997135	0.942783	0.967649	54.6617	51.4613	57.9791	481	protein binding ; zinc ion binding	Zinc finger, RING-type ; Zinc finger, CHY-type ; Zinc finger, RING-type ; Zinc finger, RING-type	KOG1940	Zn-finger protein	General function prediction only	POORLY CHARACTERIZED
jgi|Oidma1|189461|	189386	1.04071	1	166.858	173.651	0.882922	0.654106	0.870398	0.798896	0.985816	1	157.692	139.229	159.961	391	protein binding	Actin/actin-like ; Actin/actin-like ; Actin/actin-like ; Actin/actin-like	KOG0677	Actin-related protein Arp2/3 complex, subunit Arp2	Cytoskeleton	CELLULAR PROCESSES AND SIGNALING
jgi|Oidma1|190107|	190032	0.985843	0.90322	31.2799	30.8371	0.955601	1	0.887189	1	0.92841	0.975158	23.0002	21.979	24.7738	908	actin binding	Gelsolin ; Gelsolin	KOG0443	Actin regulatory proteins (gelsolin/villin family)	Cytoskeleton	CELLULAR PROCESSES AND SIGNALING
jgi|Oidma1|190588|	190513	0.959979	0.900608	57.6291	55.3227	0.868229	0.843165	0.993641	1	1.14444	0.610636	47.1958	40.9767	41.239	470	oxidoreductase activity	FAD dependent oxidoreductase
jgi|Oidma1|190753|	190678	1.10729	0.913564	27.4889	30.4383	1.00872	0.999978	1.12182	0.906918	1.11213	0.852809	20.9622	21.1449	18.8487	459	RNA binding ; pseudouridine synthesis ; pseudouridine synthase activity ; pseudouridylate synthase activity	Pseudouridine synthase ; Pseudouridine synthase ; RNA-binding S4 ; Pseudouridine synthase, RluD ; RNA-binding S4 ; Pseudouridine synthase, conserved site	KOG1919	RNA pseudouridylate synthases	RNA processing and modification	INFORMATION STORAGE AND PROCESSING
jgi|Oidma1|191247|	191172	1.01833	1	83.8577	85.395	1.02676	0.912707	1.02324	0.908724	0.996568	0.977975	85.4144	87.7	85.7086	517	glycine hydroxymethyltransferase activity ; glycine metabolic process ; L-serine metabolic process	Glycine hydroxymethyltransferase ; Glycine hydroxymethyltransferase ; Glycine hydroxymethyltransferase ; Pyridoxal phosphate-dependent transferase, major region	KOG2467	Glycine/serine hydroxymethyltransferase	Amino acid transport and metabolism	METABOLISM
jgi|Oidma1|192280|	192205	1.1945	0.554253	28.0253	33.4763	1.14125	0.868711	1.0004	1	0.876585	0.909559	16.3131	18.6174	18.6099	1076	DNA binding ; regulation of transcription, DNA-dependent ; electron transport ; oxidoreductase activity ; F420H2 dehydrogenase activity ; sulfur oxygenase reductase activity ; malolactic enzyme activity ; regulation of oxidoreductase activity	High mobility group box, HMG1/HMG2 ; Amine oxidase ; SWIRM ; High mobility group box, HMG1/HMG2 ; SWIRM ; High mobility group box, HMG	KOG0029	Amine oxidase	Secondary metabolites biosynthesis, transport and catabolism	METABOLISM
jgi|Oidma1|192390|	192315	0.979008	0.906511	81.8477	80.1295	0.967964	1	1.02482	0.932678	1.05873	0.809423	69.4996	67.273	65.644	548	hydrolase activity ; guanosine-diphosphatase activity	Nucleoside phosphatase GDA1/CD39 ; Nucleoside phosphatase GDA1/CD39	KOG1385	Nucleoside phosphatase	Nucleotide transport and metabolism	METABOLISM
jgi|Oidma1|193506|	193431	1.18674	0.277835	86.0171	102.08	0.981495	1	1.05701	0.850931	1.07694	0.734473	71.5043	70.1811	66.3956	970	protein binding ; protein complex assembly ; intracellular protein transport ; vesicle-mediated transport ; membrane coat ; protein transporter activity ; clathrin adaptor complex ; binding	Clathrin/coatomer adaptor, adaptin-like, N-terminal ; Clathrin adaptor, alpha-adaptin, appendage, C-terminal subdomain ; Clathrin adaptor, alpha/beta/gamma-adaptin, appendage, Ig-like subdomain ; Adaptor protein complex AP-2, alpha subunit ; Clathrin adaptor, alpha/beta/gamma-adaptin, appendage, Ig-like subdomain ; Armadillo-type fold ; Clathrin/coatomer adaptor, adaptin-like, appendage, Ig-like …	KOG1077	Vesicle coat complex AP-2, alpha subunit	Intracellular trafficking, secretion, and vesicular transport	CELLULAR PROCESSES AND SIGNALING
jgi|Oidma1|194279|	194204	0.970575	0.813351	240.706	233.623	0.89886	0.619113	0.973279	0.987127	1.08279	0.303743	263.559	236.903	243.407	293	magnesium ion binding ; inorganic diphosphatase activity ; cytoplasm ; phosphate metabolic process	Inorganic pyrophosphatase ; Inorganic pyrophosphatase ; Inorganic pyrophosphatase ; Inorganic pyrophosphatase	KOG1626	Inorganic pyrophosphatase/Nucleosome remodeling factor, subunit NURF38	Energy production and conversion	METABOLISM
jgi|Oidma1|194698|	194623	1.16308	0.706253	44.4229	51.6672	0.957435	1	1.03163	0.956839	1.07749	0.80477	48.9589	46.8749	45.4378	498	metabolic process ; oxidoreductase activity	Aldehyde dehydrogenase ; Aldehyde dehydrogenase, conserved site ; Aldehyde dehydrogenase, conserved site ; Aldehyde/histidinol dehydrogenase	KOG2450	Aldehyde dehydrogenase	Energy production and conversion	METABOLISM
jgi|Oidma1|195040|	194965	1.11827	0.796654	55.2464	61.7804	1.07893	0.763948	1.07966	0.794791	1.00067	0.98526	66.782	72.0534	66.7372	490	transcription factor activity ; nucleus ; regulation of transcription, DNA-dependent ; zinc ion binding	Fungal transcriptional regulatory protein, N-terminal ; Fungal transcriptional regulatory protein, N-terminal ; Fungal transcriptional regulatory protein, N-terminal ; Fungal transcriptional regulatory protein, N-terminal ; Fungal transcriptional regulatory protein, N-terminal
jgi|Oidma1|195080|	195005	0.979573	0.938304	86.7066	84.9354	1.07547	0.779913	1.0862	0.781718	1.00997	0.968477	77.3271	83.1629	76.5634	322	DNA binding	Lambda repressor-like, DNA-binding	KOG2827	Uncharacterized conserved protein	Function unknown	POORLY CHARACTERIZED
jgi|Oidma1|195121|	195046	1.0131	0.997945	67.0997	67.9784	1.05104	0.922495	0.974239	1	0.926929	0.94401	40.8042	42.8868	44.0208	460	nucleotide binding ; nucleoside-triphosphatase activity ; ATP binding ; DNA helicase activity ; nucleus ; diacylglycerol pyrophosphate phosphatase activity ; thiamin-pyrophosphatase activity ; 8-oxo-7,8-dihydroguanine triphosphatase activity ; UDP-2,3-diacylglucosamine hydrolase activity ; bis(5'-nucleosyl)-tetraphosphatase activity ; dATP pyrophosphohydrolase activity ; pyrophosphatase activity …	AAA ATPase, core ; TIP49, C-terminal ; AAA+ ATPase, core	KOG1942	DNA helicase, TBP-interacting protein	Replication, recombination and repair	INFORMATION STORAGE AND PROCESSING
jgi|Oidma1|196493|	196418	0.903782	0.433453	129.54	117.076	0.902796	0.848392	1.00017	0.971201	1.10786	0.496557	104.678	94.503	94.4866	461	nucleotide binding ; nucleoside-triphosphatase activity ; ATP binding ; nucleus ; cytoplasm ; hydrolase activity ; protein catabolic process ; ATP-dependent DNA helicase activity ; ATP-dependent RNA helicase activity ; ATP-dependent helicase activity ; DNA-dependent ATPase activity ; RNA-dependent ATPase activity ; protein-transmembrane transporting ATPase activity ; ATPase activity ; single-stra…	AAA ATPase, core ; AAA+ ATPase, core ; 26S proteasome subunit P45 ; AAA ATPase, conserved site	KOG0652	26S proteasome regulatory complex, ATPase RPT5	Posttranslational modification, protein turnover, chaperones	CELLULAR PROCESSES AND SIGNALING
jgi|Oidma1|196521|	196446	0.85079	0.537801	160.483	136.537	1.02995	0.853174	0.95101	1	0.923359	0.833694	200.554	206.56	217.201	392	steroid metabolic process	Oxysterol-binding protein ; Oxysterol-binding protein	KOG2210	Oxysterol-binding protein	Signal transduction mechanisms	CELLULAR PROCESSES AND SIGNALING
jgi|Oidma1|19742|	19667	0.811247	0.695163	68.3757	55.4696	0.979194	1	1.06203	1	1.08459	0.960299	43.6145	42.7071	40.2128	173	mitochondrial inner membrane ; protein transporter activity ; protein transport	Mitochondrial import inner membrane translocase, subunit Tim17/22	KOG3225	Mitochondrial import inner membrane translocase, subunit TIM22	Intracellular trafficking, secretion, and vesicular transport	CELLULAR PROCESSES AND SIGNALING
jgi|Oidma1|198128|	198053	0.849725	0.565394	38.1775	32.4403	0.956516	1	1.01067	1	1.05662	0.913371	27.9216	26.7075	26.4254	855	DNA binding ; histone acetyltransferase activity	Bromodomain ; Bromodomain ; Bromo adjacent region ; HMG-I and HMG-Y, DNA-binding ; Bromodomain ; Bromo adjacent region ; Bromodomain ; Bromo adjacent region ; Bromodomain ; Bromodomain	KOG1827	Chromatin remodeling complex RSC, subunit RSC1/Polybromo and related proteins	Chromatin structure and dynamics	INFORMATION STORAGE AND PROCESSING
jgi|Oidma1|198183|	198108	0.989493	0.856157	71.7002	70.9468	0.916628	0.964926	0.989428	1	1.07942	0.795235	51.7748	47.4582	47.9653	542	protein binding ; ATP binding ; cellular protein metabolic process ; protein folding ; unfolded protein binding	Chaperonin Cpn60 ; Chaperonin Cpn60/TCP-1 ; Chaperonin Cpn60/TCP-1 ; T-complex protein 1, zeta subunit ; Chaperonin TCP-1, conserved site ; Chaperonin TCP-1, conserved site ; GroEL-like chaperone, ATPase	KOG0359	Chaperonin complex component, TCP-1 zeta subunit (CCT6)	Posttranslational modification, protein turnover, chaperones	CELLULAR PROCESSES AND SIGNALING
jgi|Oidma1|198348|	198273	0.972283	0.923616	41.822	40.6628	0.994001	1	1.14161	0.743987	1.1485	0.646816	40.369	40.1269	35.1495	391	structural constituent of ribosome ; intracellular ; ribosome ; translation ; small ribosomal subunit	Ribosomal protein S2 ; Ribosomal protein S2 ; Ribosomal protein S2, bacterial-type ; Ribosomal protein S2 ; Ribosomal protein S2 ; Ribosomal protein S2	KOG0832	Mitochondrial/chloroplast ribosomal protein S2	Translation, ribosomal structure and biogenesis	INFORMATION STORAGE AND PROCESSING
jgi|Oidma1|198386|	198311	0.959503	0.815364	36.834	35.3423	0.93316	0.998996	1.07376	0.95159	1.15067	0.747931	25.3106	23.6188	21.9964	1225	protein binding ; intracellular protein transport ; vesicle-mediated transport ; binding	WD40 repeat ; Clathrin, heavy chain/VPS, 7-fold repeat ; Clathrin, heavy chain/VPS, 7-fold repeat ; Armadillo-type fold ; WD40 repeat-like	KOG2066	Vacuolar assembly/sorting protein VPS41	Intracellular trafficking, secretion, and vesicular transport	CELLULAR PROCESSES AND SIGNALING
jgi|Oidma1|198667|	198592	0.80622	0.402003	51.8084	41.769	1.08645	0.80377	1.09667	0.802101	1.00941	0.972367	47.235	51.3184	46.7946	657	protein kinase activity ; ATP binding ; protein amino acid phosphorylation	Protein kinase, core ; Protein kinase-like
jgi|Oidma1|199680|	199605	1.0943	0.828381	39.5275	43.2548	0.99864	0.999164	0.980154	1	0.981489	1	36.4102	36.3607	37.0969	538	nucleotide binding ; aminoacyl-tRNA ligase activity ; ATP binding ; cytoplasm ; translation ; tRNA aminoacylation for protein translation ; proline-tRNA ligase activity ; prolyl-tRNA aminoacylation	Prolyl-tRNA synthetase, class IIa ; Aminoacyl-tRNA synthetase, class II (G, H, P and S) ; Anticodon-binding ; Prolyl-tRNA synthetase, class II, C-terminal ; Prolyl-tRNA synthetase, class IIa, prokaryotic-type ; Aminoacyl-tRNA synthetase, class II ; Anticodon-binding ; Prolyl-tRNA synthetase, class II	KOG4163	Prolyl-tRNA synthetase	Translation, ribosomal structure and biogenesis	INFORMATION STORAGE AND PROCESSING
jgi|Oidma1|200535|	200460	1.04554	1	28.0192	29.2951	0.875683	0.938811	0.94369	1	1.07766	0.889789	24.8947	21.7998	23.1006	650	nucleic acid binding ; methyltransferase activity ; methylation	LCCL ; LCCL ; LCCL ; N-6 adenine-specific DNA methylase, conserved site ; LCCL	KOG1216	von Willebrand factor and related coagulation proteins	Extracellular structures	CELLULAR PROCESSES AND SIGNALING
jgi|Oidma1|201382|	201307	0.82543	0.391204	48.5056	40.038	1.08758	0.870643	1.0217	0.989816	0.939427	0.976492	31.132	33.8584	33.1393	414	coproporphyrinogen oxidase activity ; porphyrin biosynthetic process	Coproporphyrinogen III oxidase ; Coproporphyrinogen III oxidase ; Coproporphyrinogen III oxidase	KOG1518	Coproporphyrinogen III oxidase CPO/HEM13	Coenzyme transport and metabolism	METABOLISM
jgi|Oidma1|203192|	203117	1.17397	0.805229	25.493	29.928	1.10132	0.907123	0.970295	1	0.88103	0.907096	18.5283	20.4056	21.0303	870	transcription factor activity ; nucleus ; regulation of transcription, DNA-dependent ; zinc ion binding ; DNA binding ; transcription	Fungal transcriptional regulatory protein, N-terminal ; Fungal specific transcription factor ; Fungal transcriptional regulatory protein, N-terminal ; Fungal transcriptional regulatory protein, N-terminal ; Fungal transcriptional regulatory protein, N-terminal ; Fungal transcriptional regulatory protein, N-terminal
jgi|Oidma1|203268|	203193	0.912471	0.752108	27.9535	25.5068	0.855493	0.871209	0.914393	1	1.06885	0.907505	29.878	25.5604	27.9534	346	hydrolase activity	Beta-lactamase-like
jgi|Oidma1|203521|	203446	1.1304	0.851716	49.2113	55.6284	0.902276	0.973849	0.909202	1	1.00768	1	61.3114	55.3198	60.8443	251	transcription factor TFIID complex ; transcription initiation ; DNA binding	Transcription factor TAFII-31 ; Transcription factor TAFII-31 ; Histone-fold	KOG3334	Transcription initiation factor TFIID, subunit TAF9 (also component of histone acetyltransferase SAGA)	Transcription	INFORMATION STORAGE AND PROCESSING
jgi|Oidma1|20376|	20301	1.08919	0.688416	846.957	922.499	0.874074	0.778486	0.9429	1	1.07874	0.49555	1341.93	1172.94	1243.98	182	peptidyl-prolyl cis-trans isomerase activity ; protein folding ; cyclophilin ; FK506-sensitive peptidyl-prolyl cis-trans isomerase ; cyclophilin-type peptidyl-prolyl cis-trans isomerase activity	Peptidyl-prolyl cis-trans isomerase, cyclophilin-type ; Peptidyl-prolyl cis-trans isomerase, cyclophilin-type ; Peptidyl-prolyl cis-trans isomerase, cyclophilin-type ; Peptidyl-prolyl cis-trans isomerase, cyclophilin-type ; Cyclophilin-like	KOG0865	Cyclophilin type peptidyl-prolyl cis-trans isomerase	Posttranslational modification, protein turnover, chaperones	CELLULAR PROCESSES AND SIGNALING
jgi|Oidma1|205297|	205222	0.868685	0.715966	70.0919	60.8878	0.960594	1	0.865432	0.973839	0.900934	0.88837	32.2409	30.9704	35.7861	416	beta-lactamase activity ; beta-lactam antibiotic catabolic process ; response to antibiotic	Beta-lactamase ; Beta-lactamase-type transpeptidase fold
jgi|Oidma1|206782|	206707	0.944073	0.761545	40.111	37.8678	1.03135	0.968042	1.02547	0.989375	0.994298	1	43.095	44.4461	43.3422	432	catalytic activity ; cellular metabolic process ; coenzyme binding ; metabolic process ; oxidoreductase activity ; binding ; dTDP-glucose 4,6-dehydratase activity	NAD-dependent epimerase/dehydratase ; Short-chain dehydrogenase/reductase SDR ; NAD(P)-binding	KOG0747	Putative NAD+-dependent epimerases	Carbohydrate transport and metabolism	METABOLISM
jgi|Oidma1|207135|	207060	1.12704	0.764054	55.6261	62.693	1.0022	0.995879	1.05787	0.908397	1.05554	0.874055	46.5351	46.6376	44.0865	419	protein binding ; metabolic process ; acyltransferase activity ; dihydrolipoyllysine-residue acetyltransferase activity ; dihydrolipoamide S-acyltransferase complex ; dihydrolipoamide S-acyltransferase activity	Biotin/lipoyl attachment ; E3 binding ; Biotin/lipoyl attachment ; 2-oxo acid dehydrogenase, lipoyl-binding site ; E3 binding ; Single hybrid motif ; Dimeric alpha-beta barrel	KOG0557	Dihydrolipoamide acetyltransferase	Energy production and conversion	METABOLISM
jgi|Oidma1|208492|	208417	1.09088	0.89595	65.0989	71.0151	1.03664	0.936113	1.14905	0.631314	1.10844	0.699652	50.6905	52.5479	45.7314	450	glutamate-5-semialdehyde dehydrogenase activity ; proline biosynthetic process ; NADP binding ; metabolic process ; oxidoreductase activity	Glutamate-5-semialdehyde dehydrogenase ; Gamma-glutamyl phosphate reductase GPR ; Gamma-glutamyl phosphate reductase GPR ; Aldehyde/histidinol dehydrogenase	KOG4165	Gamma-glutamyl phosphate reductase	Amino acid transport and metabolism	METABOLISM
jgi|Oidma1|21080|	21005	1.17865	0.689649	18.9219	22.3023	0.955763	1	1.0352	0.95159	1.08311	0.749892	69.2077	66.1462	63.8972	113	nucleic acid binding ; intracellular ; zinc ion binding	Zinc finger, C2H2-type ; Zinc finger, C2H2-type
jgi|Oidma1|21375|	21300	0.83743	0.425104	306.058	256.302	0.897095	0.566682	1.05136	0.431788	1.17196	0.0181071	293.693	263.471	250.601	190	GTP binding ; intracellular ; intracellular protein transport ; small GTPase mediated signal transduction	ARF/SAR superfamily ; ARF/SAR superfamily ; ADP-ribosylation factor ; GTP-binding protein SAR1 ; Small GTP-binding protein ; GTP-binding protein SAR1	KOG0077	Vesicle coat complex COPII, GTPase subunit SAR1	Intracellular trafficking, secretion, and vesicular transport	CELLULAR PROCESSES AND SIGNALING
jgi|Oidma1|22303|	22228	1.02832	1	47.2226	48.5598	1.01875	0.989982	1.0014	1	0.982969	1	36.5142	37.1987	37.1468	220	mitochondrial inner membrane ; protein transporter activity ; protein transport	Mitochondrial import inner membrane translocase, subunit Tim17/22	KOG3324	Mitochondrial import inner membrane translocase, subunit TIM23	Intracellular trafficking, secretion, and vesicular transport	CELLULAR PROCESSES AND SIGNALING
jgi|Oidma1|22925|	22850	1.02897	1	32.4362	33.3759	0.934827	0.995899	0.965234	1	1.03253	0.931504	42.9162	40.1192	41.5642	523	zinc ion binding	Zinc finger, DHHC-type ; Zinc finger, DHHC-type ; Zinc finger, DHHC-type	KOG1315	Predicted DHHC-type Zn-finger protein	General function prediction only	POORLY CHARACTERIZED
jgi|Oidma1|22961|	22886	0.982241	0.9664	25.1987	24.7512	0.911334	0.982598	0.946591	1	1.03869	0.959642	26.884	24.5003	25.8827	305	nucleic acid binding	RNA recognition motif, RNP-1 ; RNA recognition motif, RNP-1 ; RNA recognition motif, RNP-1	KOG0126	Predicted RNA-binding protein (RRM superfamily)	General function prediction only	POORLY CHARACTERIZED
jgi|Oidma1|23491|	23416	1.12305	0.81219	46.4881	52.2085	0.939501	0.995879	0.952582	1	1.01392	0.953815	57.2476	53.7842	56.4615	535	transcription factor activity ; nucleus ; regulation of transcription, DNA-dependent ; zinc ion binding	Fungal transcriptional regulatory protein, N-terminal ; Fungal transcriptional regulatory protein, N-terminal ; Fungal transcriptional regulatory protein, N-terminal ; Fungal transcriptional regulatory protein, N-terminal ; Fungal transcriptional regulatory protein, N-terminal ; Fungal transcriptional regulatory protein, N-terminal
jgi|Oidma1|24373|	24298	0.838001	0.537928	38.8623	32.5666	0.867226	0.944867	0.875596	0.971201	1.00965	0.996063	51.3693	44.5488	50.8783	246	transcription factor activity ; nucleus ; regulation of transcription, DNA-dependent ; zinc ion binding	Fungal transcriptional regulatory protein, N-terminal ; Fungal transcriptional regulatory protein, N-terminal ; Fungal transcriptional regulatory protein, N-terminal ; Fungal transcriptional regulatory protein, N-terminal
jgi|Oidma1|24451|	24376	0.956045	0.682725	73.8935	70.6455	0.942029	0.994502	0.860646	0.884747	0.913609	0.850243	80.0631	75.4217	87.6338	308	lytic vacuole ; mannose binding ; mannose transmembrane transporter activity ; mannose transport ; integral to membrane ; protein binding	Cation-dependent mannose-6-phosphate receptor ; Mannose-6-phosphate receptor, binding	KOG4504	Cation-independent mannose-6-phosphate receptor CI-MPR	Signal transduction mechanisms	CELLULAR PROCESSES AND SIGNALING
jgi|Oidma1|24839|	24764	0.901559	0.64579	35.1158	31.6589	0.985279	1	1.03626	1	1.05174	0.937216	19.9696	19.6756	18.9872	876	microtubule cytoskeleton organization and biogenesis ; spindle pole ; microtubule organizing center	Spc97/Spc98	KOG2000	Gamma-tubulin complex, DGRIP91/SPC98 component	Cytoskeleton	CELLULAR PROCESSES AND SIGNALING
jgi|Oidma1|24933|	24858	1.0692	0.982412	24.27	25.9495	1.01791	0.975775	1.04335	0.928959	1.02499	0.938638	48.5461	49.4157	47.3627	253	catalytic activity ; phosphopantothenoylcysteine decarboxylase activity	Flavoprotein ; Flavoprotein	KOG0672	Halotolerance protein HAL3 (contains flavoprotein domain)	Inorganic ion transport and metabolism	METABOLISM
jgi|Oidma1|25581|	25506	0.842696	0.306736	42.0045	35.397	0.989592	1	1.14885	0.520431	1.16094	0.432234	70.4005	69.6678	60.6411	479	nucleic acid binding	RNA recognition motif, RNP-1 ; RNA recognition motif, RNP-1 ; RNA recognition motif, RNP-1	KOG0113	U1 small nuclear ribonucleoprotein (RRM superfamily)	RNA processing and modification	INFORMATION STORAGE AND PROCESSING
jgi|Oidma1|28436|	28361	0.8222	0.802759	15.2176	12.5119	0.943485	1	0.896281	1	0.949969	0.993953	26.7572	25.245	28.1664	306	DNA binding	SANT, DNA-binding ; Homeodomain-like
jgi|Oidma1|28770|	28695	0.865321	0.737704	68.8501	59.5774	0.859916	0.879079	0.998564	1	1.16123	0.700179	77.8883	66.9774	67.0737	249	nucleic acid binding ; methyltransferase activity ; methylation	N-6 adenine-specific DNA methylase, conserved site	KOG3350	Uncharacterized conserved protein	Function unknown	POORLY CHARACTERIZED
jgi|Oidma1|32002|	31927	0.935872	0.689879	44.2951	41.4546	1.12618	0.705762	1.02961	0.952191	0.914251	0.912449	46.0513	51.8621	50.3705	379	signal transducer activity	Regulator of G protein signalling ; Regulator of G protein signalling ; Regulator of G protein signalling superfamily
jgi|Oidma1|32032|	31957	1.15466	0.844186	23.4146	27.036	0.985951	1	0.996892	1	1.0111	0.985608	28.5539	28.1527	28.2405	417	hydrogen ion transmembrane transporter activity ; proton-transporting two-sector ATPase complex	ATPase, F1/V1/A1 complex, alpha/beta subunit, nucleotide-binding
jgi|Oidma1|36628|	36553	1.1196	0.8871	15.0422	16.8412	1.02677	0.998974	0.960405	1	0.935369	0.988714	15.4792	15.8936	16.5488	489	DNA binding ; nucleus ; transcription ; zinc ion binding	Fungal specific transcription factor
jgi|Oidma1|36994|	36919	1.04334	1	15.7512	16.4339	1.0146	0.995645	1.04619	0.976519	1.03114	0.959443	27.1426	27.5389	26.323	363	metabolic process ; acyltransferase activity	Tafazzin ; Phospholipid/glycerol acyltransferase ; Phospholipid/glycerol acyltransferase	KOG2847	Phosphate acyltransferase	Lipid transport and metabolism	METABOLISM
jgi|Oidma1|37961|	37886	1.15882	0.669558	40.5231	46.9591	1.01184	0.9915	1.00195	1	0.99022	1	53.1154	53.7444	53.64	314	phosphoribosylaminoimidazolesuccinocarboxamide synthase activity ; purine nucleotide biosynthetic process	SAICAR synthetase ; SAICAR synthetase ; SAICAR synthetase ; SAICAR synthetase	KOG2835	Phosphoribosylamidoimidazole-succinocarboxamide synthase	Nucleotide transport and metabolism	METABOLISM
jgi|Oidma1|38337|	38262	0.862569	0.577334	55.6248	47.9802	1.05575	0.921808	0.962031	1	0.911231	0.901799	37.828	39.9368	41.513	415	protein kinase activity ; ATP binding ; protein amino acid phosphorylation ; protein-tyrosine kinase activity ; protein serine/threonine kinase activity	Protein kinase, core ; Serine/threonine protein kinase-related ; Tyrosine protein kinase ; Serine/threonine protein kinase ; Protein kinase, core ; Serine/threonine protein kinase, active site ; Protein kinase-like	KOG0666	Cyclin C-dependent kinase CDK8	Transcription	INFORMATION STORAGE AND PROCESSING
jgi|Oidma1|38392|	38317	0.885645	0.481926	108.615	96.1945	0.916252	0.90233	1.06516	0.732401	1.16252	0.268123	113.467	103.964	97.604	437	protein binding ; protein complex assembly ; intracellular protein transport ; vesicle-mediated transport ; clathrin adaptor complex ; protein transporter activity ; transport	Clathrin adaptor, mu subunit ; Clathrin adaptor, mu subunit, C-terminal ; Clathrin adaptor, mu subunit ; Clathrin adaptor, mu subunit, C-terminal ; Clathrin adaptor, mu subunit ; Clathrin adaptor, mu subunit, C-terminal ; Longin-like	KOG0938	Adaptor complexes medium subunit family	Intracellular trafficking, secretion, and vesicular transport	CELLULAR PROCESSES AND SIGNALING
jgi|Oidma1|39411|	39336	1.16217	0.441522	66.196	76.9313	0.968217	1	0.941096	1	0.971988	1	49.9166	48.3301	51.3552	373	hydroxymethylbilane synthase activity ; tetrapyrrole biosynthetic process	Tetrapyrrole biosynthesis, hydroxymethylbilane synthase ; Tetrapyrrole biosynthesis, hydroxymethylbilane synthase ; Tetrapyrrole biosynthesis, hydroxymethylbilane synthase ; Tetrapyrrole biosynthesis, hydroxymethylbilane synthase ; Tetrapyrrole biosynthesis, hydroxymethylbilane synthase ; Tetrapyrrole biosynthesis, hydroxymethylbilane synthase ; Tetrapyrrole biosynthesis, hydroxymethylbilane synt…	KOG2892	Porphobilinogen deaminase	Coenzyme transport and metabolism	METABOLISM
jgi|Oidma1|40095|	40020	1.1603	0.676253	24.8693	28.8558	1.10345	0.89509	1.10035	0.927129	0.997185	1	19.3539	21.3561	19.4085	524	ubiquitin thiolesterase activity ; ubiquitin-dependent protein catabolic process ; zinc ion binding	Peptidase C19, ubiquitin carboxyl-terminal hydrolase 2 ; Zinc finger, UBP-type ; Peptidase C19, ubiquitin carboxyl-terminal hydrolase 2 ; Zinc finger, UBP-type	KOG2026	Spindle pole body protein - Sad1p	Cytoskeleton	CELLULAR PROCESSES AND SIGNALING
jgi|Oidma1|40314|	40239	0.872634	0.295577	131.95	115.144	0.935152	0.97609	0.873717	0.939284	0.934305	0.935762	88.9014	83.1363	95.1524	507	steroid metabolic process	Oxysterol-binding protein ; Oxysterol-binding protein	KOG2210	Oxysterol-binding protein	Signal transduction mechanisms	CELLULAR PROCESSES AND SIGNALING
jgi|Oidma1|41030|	40955	0.864978	0.257801	86.7855	75.0676	0.954765	0.999269	0.952484	1	0.997611	0.997478	158.949	151.759	159.33	258	electron transport ; oxidoreductase activity ; cytochrome-b5 reductase activity	NADH:cytochrome b5 reductase (CBR) ; Oxidoreductase FAD/NAD(P)-binding ; Oxidoreductase FAD-binding region	KOG0534	NADH-cytochrome b-5 reductase	Coenzyme transport and metabolism	METABOLISM
jgi|Oidma1|41734|	41659	1.03381	1	36.7636	38.0066	0.948156	1	0.951572	1	1.0036	0.982142	44.3016	42.0048	44.1426	852	integral to membrane ; GPI-anchor transamidase complex	Peptidase S54, rhomboid ; Gaa1-like, GPI transamidase component	KOG3566	Glycosylphosphatidylinositol anchor attachment protein GAA1	Posttranslational modification, protein turnover, chaperones	CELLULAR PROCESSES AND SIGNALING
jgi|Oidma1|42161|	42086	0.966382	0.760287	188.154	181.829	0.910718	0.732642	1.02644	0.704951	1.12707	0.119747	253.755	231.099	225.146	175	ATP synthesis coupled proton transport ; proton-transporting two-sector ATPase complex ; hydrogen ion transporting ATP synthase activity, rotational mechanism ; hydrogen ion transporting ATPase activity, rotational mechanism ; hydrogen-transporting two-sector ATPase activity ; proton-transporting ATP synthase complex	ATPase, F0 complex, subunit D, mitochondrial ; ATPase, F0 complex, subunit D, mitochondrial	KOG3366	Mitochondrial F1F0-ATP synthase, subunit d/ATP7	Energy production and conversion	METABOLISM
jgi|Oidma1|42250|	42175	0.811751	0.188868	47.9064	38.8881	0.876984	0.861358	1.02323	0.961325	1.16676	0.530433	61.5754	54.0006	52.7748	314	Mo-molybdopterin cofactor biosynthetic process	Molybdopterin binding ; Molybdopterin binding	KOG2644	3'-phosphoadenosine 5'-phosphosulfate sulfotransferase (PAPS reductase)/FAD synthetase and related enzymes	Amino acid transport and metabolism	METABOLISM
jgi|Oidma1|45501|	45426	0.849206	0.00106537	278.88	236.827	0.99784	0.973666	0.884192	0.815229	0.886106	0.550881	217.465	216.995	245.417	414	translation elongation factor activity ; eukaryotic translation elongation factor 1 complex ; translational elongation ; glutathione transferase activity	Translation elongation factor EF1B, gamma chain, conserved ; Glutathione S-transferase, C-terminal ; Translation elongation factor EF1B, gamma chain, conserved ; Glutathione S-transferase, N-terminal ; Translation elongation factor EF1B, gamma chain, conserved ; Glutathione S-transferase, C-terminal-like ; Thioredoxin-like fold ; Translation elongation factor EF1B, gamma chain, conserved	KOG1627	Translation elongation factor EF-1 gamma	Translation, ribosomal structure and biogenesis	INFORMATION STORAGE AND PROCESSING
jgi|Oidma1|47645|	47570	0.803023	0.378491	21.5707	17.3218	0.92057	0.995879	0.880339	1	0.956297	1	18.6658	17.1832	19.5188	537	transporter activity ; transport ; membrane ; DNA binding	Sugar transporter, conserved site ; Histone-fold	KOG4229	Myosin VII, myosin IXB and related myosins	Cell motility	CELLULAR PROCESSES AND SIGNALING
jgi|Oidma1|48409|	48334	1.09036	0.967989	17.5499	19.1358	0.856868	0.96782	0.892129	1	1.04115	0.978321	17.0801	14.6354	16.405	247	triose-phosphate isomerase activity ; metabolic process	Triosephosphate isomerase ; Triosephosphate isomerase ; Triosephosphate isomerase	KOG1643	Triosephosphate isomerase	Carbohydrate transport and metabolism	METABOLISM
jgi|Oidma1|49613|	49538	1.11454	0.903983	48.7386	54.3212	1.08962	0.874761	1.08234	0.904185	0.993319	0.995506	30.1517	32.8539	30.3545	768	inositol or phosphatidylinositol phosphatase activity ; phospholipid dephosphorylation ; protein tyrosine phosphatase activity ; dephosphorylation ; phosphoric monoester hydrolase activity ; phosphatidylinositol-4,5-bisphosphate 5-phosphatase activity ; protein tyrosine/serine/threonine phosphatase activity ; protein tyrosine/threonine phosphatase activity ; JUN kinase phosphatase activity ; phos…	Myotubularin-related ; Protein-tyrosine phosphatase, active site	KOG1089	Myotubularin-related phosphatidylinositol 3-phosphate 3-phosphatase MTM6	General function prediction only	POORLY CHARACTERIZED
jgi|Oidma1|49614|	49539	0.977137	0.874042	78.5644	76.7683	1.04387	0.946907	0.912725	1	0.874364	0.806608	38.0608	39.7306	43.5297	610	nucleotide binding ; phenylalanine-tRNA ligase activity ; ATP binding ; cytoplasm ; translation ; phenylalanyl-tRNA aminoacylation ; RNA binding ; phenylalanine-tRNA ligase complex	B3/B4 tRNA-binding domain ; tRNA synthetase, B5 ; Phenylalanyl-tRNA synthetase, class IIc, beta subunit, archae/euk cytosolic ; Putative DNA binding ; B3/B4 tRNA-binding domain	KOG2472	Phenylalanyl-tRNA synthetase beta subunit	Translation, ribosomal structure and biogenesis	INFORMATION STORAGE AND PROCESSING
jgi|Oidma1|50182|	50107	0.80512	0.0774176	102.626	82.626	0.939227	1	0.912102	1	0.97112	1	55.6114	52.2317	57.2652	470	oxidoreductase activity ; FAD binding ; electron transport ; cytoplasm ; cell redox homeostasis ; glutathione-disulfide reductase activity ; glutathione metabolic process ; NADP binding	Pyridine nucleotide-disulphide oxidoreductase, NAD-binding region ; FAD-dependent pyridine nucleotide-disulphide oxidoreductase ; Pyridine nucleotide-disulphide oxidoreductase, class I ; Mercuric reductase ; Pyridine nucleotide-disulphide oxidoreductase, NAD-binding region ; Pyridine nucleotide-disulphide oxidoreductase, dimerisation ; FAD-dependent pyridine nucleotide-disulphide oxidoreductase ;…	KOG0405	Pyridine nucleotide-disulphide oxidoreductase	Secondary metabolites biosynthesis, transport and catabolism	METABOLISM
jgi|Oidma1|50357|	50282	1.0155	1	113.202	114.957	1.12713	0.376392	0.982824	0.993836	0.871973	0.526956	113.338	127.746	129.979	648	nucleic acid binding ; zinc ion binding ; protein kinase activity ; ATP binding ; protein amino acid phosphorylation ; catalytic activity ; poly(A)-specific ribonuclease activity	Protein kinase, core ; Zinc finger, CCCH-type ; Six-hairpin glycosidase-like ; Protein kinase-like	KOG3741	Poly(A) ribonuclease subunit	RNA processing and modification	INFORMATION STORAGE AND PROCESSING
jgi|Oidma1|50726|	50651	0.842648	0.477788	23.6357	19.9166	0.93146	0.999453	1.00516	1	1.07912	0.887602	25.4649	23.7196	23.5978	490	metabolic process ; oxidoreductase activity ; carotenoid biosynthetic process ; oxidoreductase activity, acting on paired donors, with incorporation or reduction of molecular oxygen ; ubiquinone biosynthetic process ; oxidoreductase activity, acting on paired donors, with incorporation or reduction of molecular oxygen, NADH or NADPH as one donor, and incorporation of one atom of oxygen ; FAD bind…	Aromatic-ring hydroxylase ; Lycopene beta and epsilon cyclase ; Ubiquinone biosynthesis hydroxylase, UbiH/UbiF/VisC/COQ6 ; Ubiquinone biosynthesis hydroxylase, UbiH/UbiF/VisC/COQ6	KOG3855	Monooxygenase involved in coenzyme Q (ubiquinone) biosynthesis	Coenzyme transport and metabolism	METABOLISM
jgi|Oidma1|50865|	50790	1.06969	0.856265	64.95	69.4764	1.03504	0.911611	1.07545	0.788292	1.03904	0.879742	67.9465	70.3274	65.3933	543	integral to membrane	Transmembrane receptor, eukaryota	KOG2568	Predicted membrane protein	Function unknown	POORLY CHARACTERIZED
jgi|Oidma1|51771|	51696	0.841449	0.634143	66.0354	55.5654	0.996621	1	1.1204	0.965959	1.1242	0.78972	75.6064	75.3509	67.2534	214	protein modification process	Ubiquitin	KOG3493	Ubiquitin-like protein	Posttranslational modification, protein turnover, chaperones	CELLULAR PROCESSES AND SIGNALING
jgi|Oidma1|51868|	51793	0.815311	0.417002	21.5623	17.58	1.10129	0.912344	1.03792	1	0.942456	0.983493	17.6905	19.4824	18.7706	425	transcription factor activity ; nucleus ; regulation of transcription, DNA-dependent ; zinc ion binding	Fungal transcriptional regulatory protein, N-terminal
jgi|Oidma1|53619|	53544	1.07327	0.925408	38.2006	40.9994	0.959377	1	0.877216	0.988161	0.91436	0.911322	43.7733	41.9951	47.8732	341	protein kinase CK2 complex ; protein kinase CK2 regulator activity ; phosphofructokinase activity ; phosphorylase kinase regulator activity ; cobinamide kinase activity ; phosphatidylinositol phosphate kinase activity ; cyclin-dependent protein kinase regulator activity ; phenol kinase activity ; cyclin-dependent protein kinase activating kinase regulator activity ; inositol tetrakisphosphate 2-k…	Casein kinase II, regulatory subunit ; Casein kinase II, regulatory subunit ; Casein kinase II, regulatory subunit ; Casein kinase II, regulatory subunit ; Casein kinase II, regulatory subunit	KOG3092	Casein kinase II, beta subunit	Signal transduction mechanisms	CELLULAR PROCESSES AND SIGNALING
jgi|Oidma1|54052|	53977	0.925669	0.592211	63.4705	58.7527	1.14165	0.513346	1.06774	0.804955	0.935262	0.938638	66.7609	76.2175	71.382	708	GPI anchor biosynthetic process ; integral to membrane ; phosphatidylinositol N-acetylglucosaminyltransferase activity	N-acetylglucosaminyl transferase component	KOG1183	N-acetylglucosaminyltransferase complex, subunit PIG-Q/GPI1, required for phosphatidylinositol biosynthesis	Cell wall/membrane/envelope biogenesis	CELLULAR PROCESSES AND SIGNALING
jgi|Oidma1|55017|	54942	0.826774	0.26382	40.9935	33.8923	0.895633	0.953357	1.02287	0.994145	1.14206	0.711612	33.2013	29.7362	29.0714	223	ribonuclease MRP complex ; RNA binding ; ribonuclease activity ; rRNA processing ; mRNA cleavage ; tRNA processing ; ribonuclease P complex ; nucleolar ribonuclease P complex ; ribonuclease P activity	Ribonuclease P/MRP, p29 subunit, eukaryotic/archaeal ; Ribonuclease P/MRP, p29 subunit, eukaryotic/archaeal ; Ribonuclease P/MRP, p29 subunit, eukaryotic ; Ribonuclease P/MRP, p29 subunit, eukaryotic/archaeal ; Ribonuclease P/MRP, p29 subunit, eukaryotic/archaeal	KOG4046	RNase MRP and P, subunit POP4/p29	RNA processing and modification	INFORMATION STORAGE AND PROCESSING
jgi|Oidma1|57769|	57694	0.93522	0.822553	48.7257	45.5693	0.934934	0.995879	0.871414	0.974458	0.932059	0.950815	43.4053	40.5811	46.5692	567	iron ion binding ; electron transport ; integral to membrane ; oxidoreductase activity ; FAD binding ; ferric-chelate reductase activity	Ferric reductase-like transmembrane component, N-terminal ; FAD-binding 8 ; Ferric reductase, NAD binding	KOG0039	Ferric reductase, NADH/NADPH oxidase and related proteins	Secondary metabolites biosynthesis, transport and catabolism	METABOLISM
jgi|Oidma1|60118|	60043	0.953241	0.818808	42.6738	40.6784	0.959496	1	1.02419	0.942221	1.06743	0.937216	66.1519	63.4725	61.9731	184	structural constituent of ribosome ; intracellular ; ribosome ; translation	Ribosomal protein L13 ; Ribosomal protein L13 ; Ribosomal protein L13 ; Ribosomal protein L13, bacterial-type ; Ribosomal protein L13	KOG3203	Mitochondrial/chloroplast ribosomal protein L13	Translation, ribosomal structure and biogenesis	INFORMATION STORAGE AND PROCESSING
jgi|Oidma1|64195|	64120	1.17109	0.629671	59.8357	70.073	1.02224	0.944958	0.954499	1	0.933736	0.919123	68.4717	69.9942	73.3309	402	metabolic process ; methyltransferase activity	Methyltransferase type 11
jgi|Oidma1|82333|	82258	1.01166	0.993217	48.7273	49.2953	1.05428	0.950359	0.941482	1	0.893011	0.895096	28.0898	29.6144	31.4551	364	tRNA processing ; tRNA dihydrouridine synthase activity ; FAD binding ; F420H2 dehydrogenase activity ; sulfur oxygenase reductase activity ; malolactic enzyme activity ; regulation of oxidoreductase activity	Dihydrouridine synthase, DuS ; Dihydrouridine synthase, DuS ; Dihydrouridine synthase, DuS	KOG2334	tRNA-dihydrouridine synthase	Translation, ribosomal structure and biogenesis	INFORMATION STORAGE AND PROCESSING
jgi|Oidma1|83504|	83429	0.944834	0.787267	68.0294	64.2765	1.01691	0.975775	0.909838	1	0.894705	0.834848	55.1107	56.0428	61.5965	663	catalytic activity ; sphingomyelin phosphodiesterase activity	Type I phosphodiesterase/nucleotide pyrophosphatase/phosphate transferase ; Alkaline-phosphatase-like, core domain	KOG2645	Type I phosphodiesterase/nucleotide pyrophosphatase	General function prediction only	POORLY CHARACTERIZED
jgi|Oidma1|99951|	99876	0.952742	0.821073	48.5503	46.2559	0.961472	1	1.07465	0.860116	1.11772	0.669432	67.3368	64.7425	60.2449	361	binding	Armadillo-type fold
